# Supplementary material
Source: publisher figshare collection journal article supplement (https://diabetesjournals.figshare.com/articles/dataset/_/14612202)
Supplement: Supplementary file 3 [file 1]

| TABLE S2 MIQE Checklist                                             |            |              |                                                                                                   |
|---------------------------------------------------------------------|------------|--------------|---------------------------------------------------------------------------------------------------|
| ITEM TO CHECK                                                       | IMPORTANCE | CHECKLIST    | METHOD DETAILS                                                                                    |
| <b>EXPERIMENTAL DESIGN</b>                                          |            |              |                                                                                                   |
| Definition of experimental and control groups                       | E          | ✓            |                                                                                                   |
| Number within each group                                            | E          | ✓            | >20                                                                                               |
| Assay carried out by core lab or investigator's lab?                | D          | ✓            | Investigator's lab                                                                                |
| Acknowledgement of authors' contributions                           | D          | ✓            |                                                                                                   |
| <b>SAMPLE</b>                                                       |            |              |                                                                                                   |
| Description                                                         | E          | ✓            |                                                                                                   |
| Volume/mass of sample processed                                     | D          |              |                                                                                                   |
| Microdissection or macrodissection                                  | E          | Macro        |                                                                                                   |
| Processing procedure                                                | E          | ✓            |                                                                                                   |
| If frozen - how and how quickly?                                    | E          | snap         |                                                                                                   |
| If fixed - with what, how quickly?                                  | E          | N/A          |                                                                                                   |
| Sample storage conditions and duration (especially for FFPE sample) | E          | ✓            | Frozen in RNAlater                                                                                |
| <b>NUCLEIC ACID EXTRACTION</b>                                      |            |              |                                                                                                   |
| Procedure and/or instrumentation                                    | E          | ✓            |                                                                                                   |
| Name of kit and details of any modifications                        | E          | ✓            | Qiagen RNeasy Plus Mini Kit #74134                                                                |
| Source of additional reagents used                                  | D          | ✓            | Worthington DNase I LS006344                                                                      |
| Details of DNase or RNase treatment                                 | E          | ✓            |                                                                                                   |
| Contamination assessment (DNA or RNA)                               | E          | ✓            | primer sets that span exon/intron boundaries in RNA only qPCR reaction                            |
| Nucleic acid quantification                                         | E          | ✓            |                                                                                                   |
| Instrument and method                                               | E          | ✓            | Nanodrop 2000C                                                                                    |
| Purity (A260/A280)                                                  | D          | ✓            |                                                                                                   |
| Yield                                                               | D          | ✓            |                                                                                                   |
| RNA integrity method/instrument                                     | E          |              |                                                                                                   |
| RIN/RQI or Cq of 3' and 5' transcripts                              | E          |              |                                                                                                   |
| Electrophoresis traces                                              | D          |              |                                                                                                   |
| Inhibition testing (Cq dilutions, spike or other)                   | E          | ✓            |                                                                                                   |
| <b>REVERSE TRANSCRIPTION</b>                                        |            |              |                                                                                                   |
| Complete reaction conditions                                        | E          | ✓            | 65° 5 m, 42° 2 m, 42° 50 m, 70° 15 m, 37° 20 m                                                    |
| Amount of RNA and reaction volume                                   | E          | ✓            | 1 ug RNA 20 ul reaction                                                                           |
| Priming oligonucleotide (if using GSP) and concentration            | E          | ✓            | oligo d(T) 0.5 ug/ul stock                                                                        |
| Reverse transcriptase and concentration                             | E          | ✓            | Invitrogen SuperScript II # 100004925                                                             |
| Temperature and time                                                | E          | ✓            |                                                                                                   |
| Manufacturer of reagents and catalogue numbers                      |            |              | NEB Rnase H # M0297L, Invitrogen RnaseOUT # 100000840, Invitrogen First Strand 5x buffer # Y02321 |
| Cqs with and without RT                                             | D          | ✓            |                                                                                                   |
| Storage conditions of cDNA                                          | D          | ✓            | negative 20 C                                                                                     |
| <b>qPCR TARGET INFORMATION</b>                                      |            |              |                                                                                                   |
| If multiplex, efficiency and LOD of each assay.                     | E          | N/A          |                                                                                                   |
| Sequence accession number                                           | E          | ✓            | Table S2                                                                                          |
| Location of amplicon                                                | D          | ✓            | Table S3                                                                                          |
| Amplicon length                                                     | E          | ✓            | Table S3                                                                                          |
| <i>In silico</i> specificity screen (BLAST, etc)                    | E          | ✓            | PrimerBlast                                                                                       |
| Pseudogenes, retropseudogenes or other homologs?                    | D          |              |                                                                                                   |
| Sequence alignment                                                  | D          | ✓            | PrimerBlast                                                                                       |
| Secondary structure analysis of amplicon                            | D          | ✓            | PrimerBlast                                                                                       |
| Location of each primer by exon or intron (if applicable)           | E          | ✓            |                                                                                                   |
| What splice variants are targeted?                                  | E          | ✓            | when possible all                                                                                 |
| <b>qPCR OLIGONUCLEOTIDES</b>                                        |            |              |                                                                                                   |
| Primer sequences                                                    | E          | ✓            | Table S3                                                                                          |
| RTPrimerDB Identification Number                                    | D          | N/A          |                                                                                                   |
| Probe sequences                                                     | D          | N/A          |                                                                                                   |
| Location and identity of any modifications                          | E          | No mod       |                                                                                                   |
| Manufacturer of oligonucleotides                                    | D          | ✓            | Invitrogen                                                                                        |
| Purification method                                                 | D          | ✓            | manufacturer's protocol                                                                           |
| <b>qPCR PROTOCOL</b>                                                |            |              |                                                                                                   |
| Complete reaction conditions                                        | E          | ✓            |                                                                                                   |
| Reaction volume and amount of cDNA/DNA                              | E          | ✓            | 25 ul 10 ng                                                                                       |
| Primer, (probe), Mg++ and dNTP concentrations                       | E          | ✓            | 600 nM                                                                                            |
| Polymerase identity and concentration                               | E          | ✓            | Thermo Luminaris Color HiGreen Fluorescein qPCR Master Mix                                        |
| Buffer/kit identity and manufacturer                                | E          | ✓            |                                                                                                   |
| Exact chemical constitution of the buffer                           | D          | Manufacturer |                                                                                                   |
| Additives (SYBR Green I, DMSO, etc.)                                | E          | SYBR         |                                                                                                   |
| Manufacturer of plates/tubes and catalog number                     | D          | ✓            | BioRad iCycler iQ PCR plates 2239441                                                              |
| Complete thermocycling parameters                                   | E          | ✓            | 50° 2 m, 95° 10 m, 95° 15 s, 60° 1 m 40 cycles                                                    |
| Reaction setup (manual/robotic)                                     | D          | Manual       |                                                                                                   |
| Manufacturer of qPCR instrument                                     | E          | Biorad MyiQ  |                                                                                                   |
| <b>qPCR VALIDATION</b>                                              |            |              |                                                                                                   |
| Evidence of optimisation (from gradients)                           | D          | ✓            |                                                                                                   |
| Specificity (gel, sequence, melt, or digest)                        | E          | Melt         |                                                                                                   |
| For SYBR Green I, Cq of the NTC                                     | E          | ✓            |                                                                                                   |
| Standard curves with slope and y-intercept                          | E          | N/A          |                                                                                                   |
| PCR efficiency calculated from slope                                | E          | N/A          |                                                                                                   |
| Confidence interval for PCR efficiency or standard error            | D          | N/A          |                                                                                                   |
| r2 of standard curve                                                | E          | N/A          |                                                                                                   |
| Linear dynamic range                                                | E          | ✓            |                                                                                                   |
| Cq variation at lower limit                                         | E          | ✓            |                                                                                                   |
| Confidence intervals throughout range                               | D          | ✓            |                                                                                                   |
| Evidence for limit of detection                                     | E          | ✓            |                                                                                                   |
| If multiplex, efficiency and LOD of each assay.                     | E          | N/A          |                                                                                                   |
| <b>DATA ANALYSIS</b>                                                |            |              |                                                                                                   |
| qPCR analysis program (source, version)                             | E          | ✓            | RefFinder, Prism 6                                                                                |
| Cq method determination                                             | E          | ✓            | BioRad iCycler iQ                                                                                 |
| Outlier identification and disposition                              | E          | No           |                                                                                                   |
| Results of NTCs                                                     | E          | ✓            |                                                                                                   |
| Justification of number and choice of reference genes               | E          | ✓            | RefFinder, Δ Cq, NormFinder, BestKeeper, geNorm                                                   |
| Description of normalisation method                                 | E          | ✓            | geNorm                                                                                            |
| Number and concordance of biological replicates                     | D          |              |                                                                                                   |
| Number and stage (RT or qPCR) of technical replicates               | E          | ✓            | 2 replicates                                                                                      |
| Repeatability (intra-assay variation)                               | E          | ✓            |                                                                                                   |
| Reproducibility (inter-assay variation, %CV)                        | D          | ✓            |                                                                                                   |
| Power analysis                                                      | D          |              |                                                                                                   |
| Statistical methods for result significance                         | E          | ✓            | one way ANOVA, student's t-test, linear regression                                                |
| Software (source, version)                                          | E          | ✓            | Graphpad Prism 8                                                                                  |
| Cq or raw data submission using RDML                                | D          | Raw only     |                                                                                                   |
