# Supplementary material
Source: publisher figshare collection journal article supplement (https://diabetesjournals.figshare.com/articles/dataset/_/14612202)
Supplement: Supplementary file 4 [file 1]

**Figure S1.** Wide Field immunofluorescence (IF) of STAT5B (**green**), insulin (**INS**), glucagon (**GCG**) and somatostatin (**SST**), showing double staining, individual channels (inset), and complete overlays for control patient pancreata (patient # 6073, 6130 and 6153). Images serve to illustrate islet and exocrine STAT5B staining supporting the results in Fig. 1.

**Figure S2.** Wide Field immunofluorescence (IF) of STAT5B (**green**), insulin (**INS**), glucagon (**GCG**) and somatostatin (**SST**), showing double staining, individual channels (inset), and complete overlays for T1D patient pancreata (patient # 6180, 6247 and 6264). Images serve to illustrate additional islet and exocrine STAT5B staining supporting the results in Fig. 1.

**Figure S3.** Wide Field immunofluorescence (IF) of GATA4 (**green**), insulin (**INS**), glucagon (**GCG**) and somatostatin (**SST**), showing double staining, individual channels (inset), and complete overlays for control patient pancreata (patient # 6130 and 6153). Images serve to illustrate additional islet and exocrine GATA4 staining supporting the results in Fig. 2.

**Figure S4.** Wide Field immunofluorescence (IF) of GATA4 (**green**), insulin (**INS**), glucagon (**GCG**) and somatostatin (**SST**), showing double staining, individual channels (inset), and complete overlays for T1D patient pancreata (patient # 6180, 6211 and 6262). Images serve to illustrate additional islet and exocrine GATA4 staining supporting the results in Fig. 2.

**Figure S5.** Wide Field immunofluorescence (IF) of GLIS3 (**green**), insulin (**INS**), glucagon (**GCG**) and somatostatin (**SST**), showing double staining, individual channels (inset), and complete overlays for control patient pancreata (patient # 6009, 6130 and 6153). Images serve to illustrate additional islet and exocrine GLIS3 staining supporting the results in Fig. 3.

**Figure S6.** Wide Field immunofluorescence (IF) of GLIS3 (**green**), insulin (**INS**), glucagon (**GCG**) and somatostatin (**SST**), showing double staining, individual channels (inset), and complete overlays for T1D patient pancreata (patient # 6180, 6211 and 6215). Images serve to illustrate additional islet and exocrine GLIS3 staining supporting the results in Fig. 3.

**Figure S7.** Wide Field immunofluorescence (IF) of WFS1 (**green**), insulin (**INS**), glucagon (**GCG**) and somatostatin (**SST**), showing double staining, individual channels (inset), and complete overlays for control patient pancreata (patient # 6073, 6103 and 6153). Images serve to illustrate additional islet and exocrine WFS1 staining supporting the results in Fig. 4.

**Figure S8.** Wide Field immunofluorescence (IF) of WFS1 (**green**), insulin (**INS**), glucagon (**GCG**) and somatostatin (**SST**), showing double staining, individual channels (inset), and complete overlays for T1D patient pancreata (patient # 6180, 6211 and 6247). Images serve to illustrate additional islet and exocrine WFS1 staining supporting the results in Fig. 4.

**Figure S9.** Wide Field immunofluorescence (IF) of EIF2AK3/PERK (**green**), insulin (**INS**), glucagon (**GCG**) and somatostatin (**SST**), showing double staining, individual channels (inset), and complete overlays for control patient pancreata (patient # 6020, 6153 and 6160). Images serve to illustrate additional islet and exocrine EIF2AK3/PERK staining supporting the results in Fig. 5.

**Figure S10.** Wide Field immunofluorescence (IF) of EIF2AK3/PERK (**green**), insulin (**INS**), glucagon (**GCG**) and somatostatin (**SST**), showing double staining, individual channels (inset), and complete overlays for T1D patient pancreata (patient # 6211,6258 and 6264). Images serve to illustrate additional islet and exocrine EIF2AK3/PERK staining supporting the results in Fig. 5.

**Figure S11.** Donor metadata for the Unaffected/Control, T1D AAB+ and T2D. a) Body Mass Index (BMI kg/m<sup>2</sup>); b) Hemoglobin A1c (HbA1c mmol/mol); c) C-peptide pmol/L and d) Disease duration, years.
