# Supplementary material
Source: publisher figshare collection journal article supplement (https://diabetesjournals.figshare.com/articles/dataset/_/14612202)
Supplement: Supplementary file 8 [file 1]

| Controls Unaffected |          |             |                  |                      |        |            |                    |                     |             |                        |                                                                                                                                                          |
|---------------------|----------|-------------|------------------|----------------------|--------|------------|--------------------|---------------------|-------------|------------------------|----------------------------------------------------------------------------------------------------------------------------------------------------------|
| nPOD ID             | AutoAb   | Age (years) | Duration (years) | Age at Onset (years) | Sex    | Ethnicity  | C-Peptide (pmol/L) | HbA1c (mmol/mol)/ % | BMI (kg/m2) | Cause of Death         | HiRes HLA                                                                                                                                                |
| 6004                | No serum | 33          |                  |                      | male   | Caucasian  |                    |                     | 30.9        | head trauma            | A*23:01/24:02 B*44:02/52:01<br>C*05:01/12:02<br>DRB1*04:01/15:02<br>DQA1*01:03/03:01<br>DQB1*03:01/06:01<br>DPA1*01:03/02:01<br>DPB1*04:02/13:01         |
| 6005                | neg      | 5           |                  |                      | female | Caucasian  |                    |                     | 15.7        | cerebrovascular/stroke | A*02:01/24:02 B*37:01/55:01<br>C*03:03/06:02<br>DRB1*01:01/12:01<br>DQA1*01:01/05:01<br>DQB1*03:01/05:01<br>DPA1*01:03/01:03<br>DPB1*04:01/04:02         |
| 6007                | no serum | 9           |                  |                      | male   | African Am |                    |                     | 20          | anoxia                 | A*30:02/30:02 B*35:01/35:01<br>C*04:01/04:01<br>DRB1*11:01/11:02<br>DQA1*01:02/05:01<br>DQB1*03:01/06:02<br>DPA1*02:01/03:01<br>DPB1*01:01/04:02         |
| 6008                | no serum | 50          |                  |                      | female | Caucasian  |                    |                     | 24.2        | head trauma            | A*02:05/26:01 B*38:01/58:01<br>C*07:01/12:03<br>DRB1*04:02/13:02<br>DQA1*01:02/03:01<br>DQB1*03:02/06:09<br>DPA1*01:03/01:03<br>DPB1*03:01/04:01         |
| 6009                | negative | 45          |                  |                      | male   | Caucasian  | 3746.92            |                     | 30.6        | anoxia                 | A*11:01/29:02 B*50:01/57:01<br>C*06:02/06:02<br>DRB1*07:01/15:01<br>DQA1*01:02/02:01<br>DQB1*03:03/06:02<br>DPA1*01:03/01:03<br>DPB1*02:01/04:01         |
| 6010                | no serum | 47          |                  |                      | female | Caucasian  |                    |                     | 19.7        | cerebrovascular/stroke | A* 02:01/02:01 B* 07:02/57:01<br>C* 06:02/07:02 DRB1*<br>07:01/15:01 DQA1*<br>01:02/02:01 DQB1*<br>03:03/06:02 DPA1*<br>01:03/01:03 DPB1*<br>02:01/04:01 |
| 6011                | no serum | 46          |                  |                      | female | African Am |                    |                     | 26.3        | cerebrovascular/stroke | A*30:01/68:01 B*42:02/58:02<br>C*06:02/17:01<br>DRB1*08:04/13:03<br>DQA1*04:01/05:01<br>DQB1*03:01/03:01<br>DPA1*02:01/02:01<br>DPB1*01:01/17:01         |
| 6012                | negative | 68          |                  |                      | female | Caucasian  | 983.07             |                     | 23.7        | cerebrovascular/stroke | A*30:01/68:01 B*42:02/58:02<br>C*06:02/17:01                                                                                                             |

|      |          |      |  |  |        |           |         |        |      |                        |                                                                                                                                                   |
|------|----------|------|--|--|--------|-----------|---------|--------|------|------------------------|---------------------------------------------------------------------------------------------------------------------------------------------------|
|      |          |      |  |  |        |           |         |        |      |                        | DRB1*08:04/13:03<br>DQA1*04:01/05:01<br>DQB1*03:01/03:01<br>DPA1*02:01/02:01<br>DPB1*01:01/17:01                                                  |
| 6013 | negative | 65   |  |  | male   | Caucasian | 926.8   |        | 24.2 | cerebrovascular/stroke | A*01:01/01:01 B*07:02/44:03<br>C*02:02/07:02<br>DRB1*01:02/13:01<br>DQA1*01:01/01:03<br>DQB1*05:01/06:03 D<br>PA1*01:03/01:03<br>DPB1*04:01/04:01 |
| 6017 | negative | 59   |  |  | female | Caucasian | 3273.59 |        | 24.8 | cerebrovascular/stroke | A*02:01/11:01 B*35:01/40:01<br>C*03:04/04:01<br>DRB1*01:03/11:01<br>DQA1*01:01/05:01<br>DQB1*03:01/05:01<br>DPA1*01:03/01:03<br>DPB1*02:01/04:01  |
| 6020 | negative | 60   |  |  | male   | Caucasian | 933.42  |        | 29.8 | cerebrovascular/stroke | A*03:01/23:01 B*07:02/44:03<br>C*04:01/07:02<br>DRB1*07:01/13:01<br>DQA1*01:03/02:01<br>DQB1*02:01/06:03<br>DPA1*01:03/01:03<br>DPB1*04:01/04:01  |
| 6024 | negative | 21   |  |  | male   | Caucasian | 1165.12 |        | 27.8 | head trauma            | A*03:01/23:01 B*07:02/44:03<br>C*04:01/07:02<br>DRB1*07:01/13:01<br>DQA1*01:03/02:01<br>DQB1*02:01/06:03<br>DPA1*01:03/01:03<br>DPB1*04:01/04:01  |
| 6030 | negative | 30.1 |  |  | male   | Caucasian | 840.74  |        | 27.1 | head trauma            | A*02:01/31:01 B*07:02/44:03<br>C*07:02/16:01<br>DRB1*07:01/15:01<br>DQA1*01:02/02:01<br>DQB1*02:01/06:02<br>DPA1*01:03/02:02<br>DPB1*01:01/03:01  |
| 6034 | negative | 32   |  |  | female | Caucasian | 1042.65 |        | 25.2 | head trauma            | A*03:01/03:01 B*07:02/15:01<br>C*01:02/07:02<br>DRB1*01:01/08:01<br>DQA1*01:01/04:01<br>DQB1*04:02/05:01<br>DPA1*01:03/01:03<br>DPB1*03:01/03:01  |
| 6047 | negative | 7.8  |  |  | male   | Caucasian | 215.15  | 37/5.5 | 23.9 | anoxia                 | A*02:01/03:01 B*07:02/51:01<br>C*01:02/07:02<br>DRB1*14:01/15:01<br>DQA1*01:01/01:02<br>DQB1*05:03/06:02<br>DPA1*01:03/01:03<br>DPB1*04:01/04:02  |
| 6048 | negative | 30   |  |  | male   | Caucasian | 5928.21 |        | 20.6 | cerebrovascular/stroke | A*03:01/31:01 B*07:02/47:01<br>C*06:02/07:02<br>DRB1*04:01/15:01                                                                                  |

|      |          |      |  |  |        |            |         |        |      |                        |                                                                                                                                                  |
|------|----------|------|--|--|--------|------------|---------|--------|------|------------------------|--------------------------------------------------------------------------------------------------------------------------------------------------|
|      |          |      |  |  |        |            |         |        |      |                        | DQA1*01:02/03:01<br>DQB1*03:01/06:02<br>DPA1*01:03/01:03<br>DPB1*04:01/04:01                                                                     |
| 6055 | negative | 27   |  |  | male   | Caucasian  | 195.29  |        | 22.7 | anoxia                 | A*03:01/03:01 B*07:02/15:01<br>C*01:02/07:02<br>DRB1*01:01/08:01<br>DQA1*01:01/04:01<br>DQB1*04:02/05:01<br>DPA1*01:03/01:03<br>DPB1*03:01/03:01 |
| 6057 | negative | 22   |  |  | male   | Caucasian  | 5372.13 |        | 26   | head trauma            | A*02:01/31:01 B*40:01/44:02<br>C*03:04/05:01<br>DRB1*01:01/04:04<br>DQA1*01:01/03:01<br>DQB1*03:02/05:01<br>DPA1*01:03:01:03<br>DPB1*04:02/06:01 |
| 6058 | negative | 27   |  |  | male   | Hispanic   | 3008.79 |        | 19.1 | head trauma            | A*02:01/02:06 B*39:01/39:02<br>C*07:02/07:02<br>DRB1*08:02/16:xx<br>DQA1*04:01/05:01<br>DQB1*03:01/04:02<br>DPA1*01:03/01:03<br>DPB1*04:02/04:02 |
| 6073 | negative | 19.2 |  |  | male   | Caucasian  | 228.39  |        | 36   | anoxia                 | A*29/01, B*37/44, DR*13/16,<br>DQ*05/06                                                                                                          |
| 6075 | negative | 16   |  |  | male   | African Am | 973.14  |        | 14.9 | anoxia                 | A*23:01/33:03 B*15:03/58:01<br>C*02:02/07:01<br>DRB1*07:01/11:01<br>DQA1*02:01/05:01<br>DQB1*02:01/03:01<br>DPA1*02:01/02:01<br>DPB1*11:01/13:01 |
| 6096 | negative | 16   |  |  | female | African Am | 983.07  |        | 18.8 | head trauma            | A*02:01/30:02 B*14:02/42:01<br>C*08:02/17:01<br>DRB1*03:02/15:03<br>DQA1*01:02/04:01<br>DQB1*04:02/06:02<br>DPA1*02:02/03:01<br>DPB1*01:01/04:02 |
| 9098 | negative | 17.8 |  |  | male   | Caucasian  | 466.71  | 30/4.9 | 22.8 | head trauma            | A*01:01/32:01 B*08:01/27:05<br>C*01:02/07:01<br>DRB1*03:01/08:01<br>DQA1*04:01/05:01<br>DQB1*02:01/04:02<br>DPA1*01:03/02:01<br>DPB1*01:01/04:01 |
| 6102 | negative | 45.1 |  |  | female | Caucasian  | 182.05  | 43/6.1 | 35.1 | cerebrovascular/stroke | A*03:01/31:01 B*08:01/44:02<br>C*05:01/07:01<br>DRB1*03:01/04:01<br>DQA1*03:01/05:01<br>DQB1*02:01/03:01<br>DPA1*01:03/02:01<br>DPB1*01:01/02:01 |

|      |          |      |  |  |        |           |         |        |      |                   |                                                                                                                                                  |
|------|----------|------|--|--|--------|-----------|---------|--------|------|-------------------|--------------------------------------------------------------------------------------------------------------------------------------------------|
| 6103 | negative | 1.5  |  |  | male   | Caucasian | 324.38  | 43/6.1 | 16.8 | anoxia            | A*02:01/80:01 B*40:02/44:02<br>C*04:01/05:01<br>DRB1*11:01/13:01<br>DQA1*01:03/05:01<br>DQB1*03:01/06:03<br>DPA1*01:03/02:01<br>DPB1*04:01/10:01 |
| 6104 | negative | 41   |  |  | male   | Caucasian | 6802.05 |        | 20.5 | anoxia            | A*29:02/68:01 B*39:06/44:03<br>C*12:03/16:01<br>DRB1*07:01/13:01<br>DQA1*01:01/02:01<br>DQB1*02:01/05:01<br>DPA1*01:03/02:02<br>DPB1*01:01/03:01 |
| 6106 | negative | 2.9  |  |  | male   | Caucasian | 2436.16 |        | 17.4 | anoxia            | A*31:01/32:01 B*27:05/52:01<br>C*01:02/15:02<br>DRB1*01:01/04:07<br>DQA1*01:01/03:01<br>DQB1*03:02/05:01<br>DPA1*01:03/01:03<br>DPB1*04:01/04:02 |
| 6117 | negative | 0.33 |  |  | male   | Caucasian | 1082.37 |        | 18.4 | head trauma       | A*01:01/11:01 B*18:01/57:01<br>C*06:02/07:01<br>DRB1*07:01/07:01<br>DQA1*02:01/02:01<br>DQB1*02:01/03:03<br>DPA1*01:03/01:03<br>DPB1*02:01/04:01 |
| 6125 | negative | 0.42 |  |  | male   | Caucasian | 3051.82 |        | 18.9 | other: meningitis | A*24:02/24:02 B*07:02/40:01<br>C*03:04/07:02<br>DRB1*04:04/15:01<br>DQA1*01:02/03:01<br>DQB1*03:02/06:03<br>DPA1*01:03/01:03<br>DPB1*03:01/06:01 |
| 6126 | negative | 25.2 |  |  | male   | Hispanic  | 291.28  |        | 25.1 | head trauma       | A*29:02/33:01 B*14:02/44:03<br>C*08:02/16:01<br>DRB1*03:01/07:01<br>DQA1*02:01/05:01<br>DQB1*02:01/02:01<br>DPA1*01:03/01:03<br>DPB1*04:01/04:01 |
| 6129 | negative | 42.9 |  |  | female | Caucasian | 168.81  | 33/5.2 | 23.4 | anoxia            | A*03:01/23:01 B*07:02/14:02<br>C*07:02/08:02<br>DRB1*03:01/15:01<br>DQA1*01:02/05:01<br>DQB1*02:01/06:02<br>DPA1*01:03/02:01<br>DPB1*01:01/04:01 |
| 6130 | negative | 5.2  |  |  | male   | Caucasian | 1588.8  |        | 18.5 | head trauma       | A* 01:01, 03:01 DRB1* 03:01,<br>15:01 DQA1* 01:02, 05:01<br>DQB1* 02:01, 06:02                                                                   |
| 6131 | negative | 24.2 |  |  | male   | Caucasian | 334.31  |        | 24.8 | anoxia            | A*01:01/11:01 B*08:01/18:01<br>C*05:01/07:01<br>DRB1*03:01/03:01<br>DQA1*05:01/05:01<br>DQB1*02:01/02:01                                         |

|      |             |      |  |  |        |           |         |        |      |                                 |                                                                                                                                                  |
|------|-------------|------|--|--|--------|-----------|---------|--------|------|---------------------------------|--------------------------------------------------------------------------------------------------------------------------------------------------|
|      |             |      |  |  |        |           |         |        |      |                                 | DPA1*01:03/02:01<br>DPB1*01:01/02:02                                                                                                             |
| 6134 | negative    | 26.7 |  |  | male   | Caucasian | 1188.29 |        | 20.1 | anoxia                          | A*03:01/29:02 B*37:01/44:03<br>C*06:02/16:01<br>DRB1*07:01/10:01<br>DQA1*01:01/02:01<br>DQB1*02:01/05:01<br>DPA1*01:03/02:01<br>DPB1*04:01/11:01 |
| 6137 | negative    | 8.9  |  |  | female | Hispanic  | 4015.03 | 44/6.2 | 24.2 | cerebrovascular/stroke          | A*24:02/33:01 B*14:02/44:02<br>C*02:02/08:02<br>DRB1*03:01/07:01<br>DQA1*02:01/05:01<br>DQB1*02:01/02:01<br>DPA1*01:03/01:03<br>DPB1*02:01/04:01 |
| 6140 | negative    | 38   |  |  | male   | Caucasian | 3674.1  | 42/6   | 21.7 | cerebrovascular/stroke          | A*01:01/03:01 B*35:01/35:01<br>C*04:01/04:01<br>DRB1*01:01/03:01<br>DQA1*01:01/05:01<br>DQB1*02:01/05:01<br>DPA1*01:03/01:03<br>DPB1*04:01/04:02 |
| 6144 | negative    | 7.5  |  |  | female | Hispanic  | 420.37  |        | 16.3 | respiratory<br>distress/failure | A*02:01/02:01 B*40:05/44:03<br>C*03:02/16:01<br>DRB1*07:01/08:02<br>DQA1*02:01/04:01<br>DQB1*02:02/04:02<br>DPA1*01:03/02:02<br>DPB1*01:01/04:02 |
| 6153 | negative    | 15.2 |  |  | male   | Hispanic  | 2773.78 | 37/5.5 | 20.5 | head trauma                     | A*24:02/26:01 B*35:05/58:01<br>C*03:02/04:01<br>DRB1*04:04/13:02<br>DQA1*01:02/03:01<br>DQB1*03:02/06:09<br>DPA1*01:03/01:03<br>DPB1*04:01/04:02 |
| 6160 | negative    | 22.1 |  |  | male   | Caucasian | 132.4   | 33/5.2 | 23.9 | head trauma                     | not listed                                                                                                                                       |
| 6165 | negative    | 45.8 |  |  | female | Caucasian | 1472.95 | 38/5.6 | 25   | cerebrovascular/stroke          | A*01:01, 02:01 DRB1*13:01,<br>15:01 DQA1*01:02, 01:03<br>DQB1*06:02, 06:03                                                                       |
| 6168 | no<br>serum | 51   |  |  | male   | Hispanic  |         | 44/6.2 | 25.2 | cerebrovascular/stroke          | A*02:01, 24:02 DRB1*01:03,<br>04:04 DQA1*01:01, 03:01<br>DQB1*03:02, 05:01                                                                       |
| 6172 | negative    | 19.2 |  |  | female | Caucasian | 2654.62 | 36/5.4 | 32.4 | cerebrovascular/stroke          | A*03:01, 68:02 DRB1*01:01,<br>13:03 DQA1*01:01, 05:01<br>DQB1*03:01, 05:01                                                                       |
| 6174 | negative    | 20.9 |  |  | male   | Caucasian | 993     |        | 19.5 | cerebrovascular/stroke          | A*02:05, 26:01 DRB1*03:01,<br>07:01 DQA1*02:01, 05:01<br>DQB1*02:01, 02:02                                                                       |
| 6178 | negative    | 24.5 |  |  | female | Caucasian | 1506.05 | 31/5.0 | 27.5 | anoxia                          | A*02:01, 24:02 DRB1*04:01,<br>15:01 DQA1*01:02, 03:01<br>DQB1*03:01, 06:02                                                                       |

|                        |               |                    |                         |                             |            |                  |                           |                            |                    |                        |                                                                                                          |
|------------------------|---------------|--------------------|-------------------------|-----------------------------|------------|------------------|---------------------------|----------------------------|--------------------|------------------------|----------------------------------------------------------------------------------------------------------|
| 6179                   | negative      | 20                 |                         |                             | female     | Caucasian        | 906.94                    |                            | 20.7               | head trauma            | A*02:01, 24:02 DRB*03:01, 04:04 DQA1*03:01, 05:01 DQB1*02:01, 03:02                                      |
| 6183                   | no serum      | 0.3                |                         |                             | male       | African Am       |                           |                            | 15.4               | birth defect           | A*02:01, 30:01 DRB1*01:02, 03:02 DQA1*01:01, 04:01 DQB1*04:02, 05:01                                     |
| 6217                   | negative      | 0.58               |                         |                             | male       | Caucasian        | 433.61                    |                            | 17.6               | anoxia                 | A*03:01, 03:01 DRB*04:07, 08:01 DQA1*03:01, 04:01 DQB1*03:01, 04:02                                      |
| 6227                   | negative      | 17                 |                         |                             | female     | Caucasian        | 910.25                    |                            | 26.4               | cerebrovascular/stroke | A*02:01, 03:01 DRB1*04:01, 13:02 DQA1*01:02, 03:01 DQB1*03:02, 06:04                                     |
| 6229                   | negative      | 31                 |                         |                             | female     | Caucasian        | 2062.13                   | 37/5.5                     | 26.9               | head trauma            | A*02:01, 24:02 DRB1*01:01, 13:02 DQA1*01:02, 01:02 DQB1*05:04, 06:04                                     |
| 6232                   | negative      | 14                 |                         |                             | female     | Caucasian        | 6454.5                    |                            | 20.8               | head trauma            | A*02:01, 24:02 DRB1*15:01, 15:01 DQA1*01:02, 01:02 DQB1*06:02, 06:02                                     |
| 6233                   | negative      | 14                 |                         |                             | male       | Caucasian        | 2403.06                   | 37/5.5                     | 21.9               | anoxia                 | A*01:01, 26:01 DRB1*01:01, 13:01 DQA1*01:01, 01:03 DQB1*05:01, 06:03                                     |
| 6234                   | negative      | 20                 |                         |                             | female     | Caucasian        | 2280.59                   | 40/5.8                     | 25.6               | head trauma            | A*02:01, 11:01 DRB1*11:01, 15:01 DQA1*01:02, 05:01 DQB1*03:01, 06:02                                     |
| 6235                   | negative      | 30                 |                         |                             | male       | Caucasian        | 2681.1                    |                            | 25.4               | head trauma            | A*24:02, 68:01 DRB1*03:01, 04:07 DQA1*03:01, 05:01 DQB1*02:01, 03:02                                     |
| 6271                   | negative      | 17                 |                         |                             | male       | Caucasian        | 3796.57                   |                            | 24.4               | head trauma            | A*02:01,02:06<br>DRB1*07:01,15:02<br>DQA1*01:01,02:01<br>DQB1*02:02,05:01                                |
| 6278                   | negative      | 12                 |                         |                             | female     | African Am       | 1502.74                   | 45/6.3                     | 21.3               | anoxia                 | A*23:01,68:02<br>DRB1*11:04,12:01<br>DQA1*03:01,05:01<br>DQB1*03:01,05:02                                |
| 6316                   | negative      | 6                  |                         |                             | male       | Caucasian        | 1515.98                   |                            | 18.4               | anoxia                 | A*24:02, 31:01<br>DRB1*04:04,13:01<br>DQA1*03:01,03:01<br>DQB1*03:02,03:03                               |
| 6318                   | negative      | 10                 |                         |                             | female     | Caucasian        | 1287.59                   | 33/5.2                     | 17.6               | head trauma            | A*03:01, 03:01<br>DRB1*04:04,11:01<br>DQA1*03:01,05:01<br>DQB1*03:01,03:02                               |
|                        |               |                    |                         |                             |            |                  |                           |                            |                    |                        |                                                                                                          |
| <b>Type 1 Diabetes</b> |               |                    |                         |                             |            |                  |                           |                            |                    |                        |                                                                                                          |
| <b>nPOD ID</b>         | <b>AutoAb</b> | <b>Age (years)</b> | <b>Duration (years)</b> | <b>Age at Onset (years)</b> | <b>Sex</b> | <b>Ethnicity</b> | <b>C-Peptide (pmol/L)</b> | <b>HbA1c (mmol/mol)/ %</b> | <b>BMI (kg/m2)</b> | <b>Cause of Death</b>  | <b>HiRes HLA</b>                                                                                         |
| 6025                   | mIAA+         | 23.8               | 19                      | 4.80                        | male       | Caucasian        |                           |                            | 26.6               | anoxia                 | A*03:05/29:02 B*13:02/44:03<br>C*06:02/16:01<br>DRB1*07:01/07:01<br>DQA1*02:01/02:01<br>DQB1*02:01/02:01 |

|      |                                    |      |         |       |        |           |  |        |      |                        |                                                                                                                                                          |
|------|------------------------------------|------|---------|-------|--------|-----------|--|--------|------|------------------------|----------------------------------------------------------------------------------------------------------------------------------------------------------|
|      |                                    |      |         |       |        |           |  |        |      |                        | DPA1*01:03/02:02<br>DPB1*01:01/04:01                                                                                                                     |
| 6026 | mIAA+                              | 22.4 | 9       | 13.40 | male   | Caucasian |  |        | 24.1 | head trauma            | A* 01:01/24:02 B*08:01/18:01<br>C*07:01/12:03<br>DRB1*03:01/13:02<br>DQA1*01:02/05:01<br>DQB1*02:01/06:04<br>DPA1*01:03/01:03<br>DPB1*02:01/04:01        |
| 6031 | mIAA+                              | 39   | 35      | 4.00  | male   | Caucasian |  |        | 24.5 | cerebrovascular/stroke | A*03:01/30:01 B*07:02/13:02<br>C*06:02/07:02<br>DRB1*01:01/07:01<br>DQA1*01:01/02:01<br>DQB1*02:01/05:01<br>DPA1*01:03/02:01<br>DPB1*02:01/17:01         |
| 6032 | mIAA+                              | 33.8 | no info |       | male   | Caucasian |  |        | 29.4 | anoxia                 | A*02:01/02:01 B*40:01/44:05<br>C*02:02/03:04<br>DRB1*03:01/04:01<br>DQA1*03:01/05:01<br>DQB1*02:01/03:02<br>DPA1*01:03/01:03<br>DPB1*03:01/04:02         |
| 6035 | mIAA+                              | 32.1 | 28      | 4.10  | male   | Caucasian |  |        | 27.1 | cerebrovascular/stroke | A*02:01/02:01 B*08:01/15:01<br>C*03:04/07:01<br>DRB1*03:01/04:01<br>DQA1*03:01/05:01<br>DQB1*02:01/03:02<br>DPA1*01:03/02:01<br>DPB1*01:01/04:01         |
| 6039 | GADA+<br>IA-2A+<br>ZnT8A+<br>mIAA+ | 28.7 | 12      | 16.70 | female | Caucasian |  |        | 23.4 | head trauma            | A* 01:01/02:01 B* 08:01/27:05<br>C* 01:02/07:01 DRB1*<br>03:01/04:01 DQA1*<br>03:01/05:01 DQB1*<br>02:01/03:02 DPA1*<br>01:03/02:02 DPB1*<br>04:01/05:01 |
| 6040 | mIAA+                              | 50   | 20      | 30.00 | female | Caucasian |  | 56/7.3 | 31.6 | cerebrovascular/stroke | A*11:01/30:02 B*15:01/18:01<br>C*03:03/05:01<br>DRB1*01:02/03:01<br>DQA1*01:01/05:01<br>DQB1*02:01/05:01<br>DPA1*01:03/01:03<br>DPB1*02:01/02:02         |
| 6041 | negative                           | 26.3 | 23      | 3.30  | male   | Caucasian |  |        | 28.4 | cerebrovascular/stroke | A*02:01/02:01 B*35:01/40:01<br>C*03:04/04:01<br>DRB1*01:01/04:01<br>DQA1*01:01/03:01<br>DQB1*03:02/05:01<br>DPA1*01:03/02:01<br>DPB1*01:01/16:01         |
| 6045 | ZnT8A+<br>mIAA+                    | 26.4 | 8       | 18.40 | male   | Caucasian |  |        | 23.1 | head trauma            | A*01:01/03:01 B*08:01/14:02<br>C*07:01/08:02<br>DRB1*03:01/13:02<br>DQA1*01:02/05:01<br>DQB1*02:01/06:09                                                 |

|      |                                    |      |    |       |        |            |  |          |      |                        |                                                                                                                                                  |
|------|------------------------------------|------|----|-------|--------|------------|--|----------|------|------------------------|--------------------------------------------------------------------------------------------------------------------------------------------------|
|      |                                    |      |    |       |        |            |  |          |      |                        | DPA1*01:03/01:03<br>DPB1*02:01/04:02                                                                                                             |
| 6049 | GADA+<br>mIAA+                     | 15   | 10 | 5.00  | female | African Am |  |          | 20.8 | anoxia                 | A*32:01/33:03 B*35:01/40:01<br>C*03:04/04:01<br>DRB1*04:04/09:01<br>DQA1*03:01/03:01<br>DQB1*02:01/03:02<br>DPA1*01:03/02:01<br>DPB1*04:01/17:01 |
| 6051 | mIAA+                              | 20.3 | 13 | 7.30  | male   | Caucasian  |  |          | 21.5 | head trauma            | A*01:01/68:02 B*08:01/27:02<br>C*02:02/07:01<br>DRB1*03:01/16:01<br>DQA1*01:02/05:01<br>DQB1*02:01/05:02<br>DPA1*01:03/02:01<br>DPB1*01:01/02:01 |
| 6054 | mIAA+                              | 35.1 | 30 | 5.10  | female | Caucasian  |  |          | 30.4 | cerebrovascular/stroke | A*01:01/02:01 B*08:01/44:02<br>C*05:01/07:01<br>DRB1*03:01/04:01<br>DQA1*03:01/05:01<br>DQB1*02:01/03:02<br>DPA1*01:03/02:01<br>DPB1*01:01/02:01 |
| 6062 | no<br>serum<br>avail               | 10.7 | 6  | 4.70  | male   | African Am |  | 112/12.4 | 21.9 | cerebral edema         | A*02:01/24:02 B*14:01/45:01<br>C*02:10/16:01<br>DRB1*01:02/07:01<br>DQA1*01:01/03:01<br>DQB1*02:01/05:01<br>DPA1*01:03/02:01<br>DPB1*01:01/18:01 |
| 6063 | mIAA+                              | 4.4  | 3  | 1.40  | male   | Caucasian  |  |          | 23.8 | anoxia                 | A*02:01/24:02 B*08:01/15:01<br>C*03:04/07:01<br>DRB1*03:01/04:01<br>DQA1*03:01/05:01<br>DQB1*02:01/03:02<br>DPA1*01:03/01:03<br>DPB1*02:01/04:01 |
| 6064 | GADA+<br>IA-2A+<br>mIAA+<br>ZnT8A+ | 19.6 | 9  | 10.60 | female | Caucasian  |  |          | 22.6 | anoxia                 | A*02:01/29:02 B*15:01/44:03<br>C*03:04/16:01<br>DRB1*01:01/04:01<br>DQA1*01:01/03:01<br>DQB1*03:02/05:01<br>DPA1*01:03/01:03<br>DPB1*03:01/04:01 |
| 6067 | negative                           | 32.6 | 8  | 24.60 | female | Hispanic   |  |          | 26.8 | anoxia                 | A*24:02/30:02 B*18:01/39:01<br>C*05:01/07:02<br>DRB1*03:01/04:07<br>DQA1*03:01/05:01<br>DQB1*02:01/03:02<br>DPA1*01:03/01:03<br>DPB1*04:01/04:02 |
| 6070 | IA-2A+<br>mIAA+                    | 22.6 | 7  | 15.60 | female | Caucasian  |  |          | 21.6 | anoxia                 | A*02:01/02:05 B*38:01/58:01<br>C*07:01/12:03<br>DRB1*10:01/16:01<br>DQA1*01:01/01:02<br>DQB1*05:01/05:02                                         |



|      |                                    |      |      |       |        |            |        |         |      |                        |                                                                                                                                                   |
|------|------------------------------------|------|------|-------|--------|------------|--------|---------|------|------------------------|---------------------------------------------------------------------------------------------------------------------------------------------------|
|      |                                    |      |      |       |        |            |        |         |      |                        | DPA1*01:03/02:01<br>DPB1*13:01/14:01                                                                                                              |
| 6076 | GADA+<br>mIAA+                     | 25.8 | 14   | 11.80 | male   | Caucasian  |        | 66/8.2  | 18.8 | anoxia                 | A*03:01/30:02 B*18:01/40:01<br>C*03:04/05:01<br>DRB1*03:01/04:04<br>DQA1*03:01/05:01<br>DQB1*02:01/03:02<br>DPA1*01:03/01:03<br>DPB1*02:02/06:01  |
| 6081 | negative                           | 31.4 | 15   | 16.40 | male   | Hispanic   | 79.44  |         | 28   | cerebrovascular/stroke | A* 01:01/24:02 B*07:02/39:01<br>C*07:02/07:02<br>DRB1*04:07/08:02<br>DQA1*03:01/04:01<br>DQB1*03:01/04:02<br>DPA1*01:03/01:03<br>DPB1*03:01/04:02 |
| 6113 | mIAA+                              | 13.1 | 1.58 | 11.52 | female | Caucasian  |        |         | 24.8 | head trauma            | A*02:01/03:01 B*08:01/44:02<br>C*07:01/07:04<br>DRB1*01:01/03:01<br>DQA1*01:01/05:01<br>DQB1*02:01/05:01<br>DPA1*01:03/02:01<br>DPB1*04:01/14:01  |
| 6141 | GADA+<br>IA-2A+<br>ZnT8A+<br>mIAA+ | 36.7 | 28   | 8.70  | male   | Caucasian  |        |         | 26   | cerebrovascular/stroke | A*01:01/01:01 B*08:01/15:01<br>C*01:02/03:03<br>DRB1*03:01/04:01<br>DQA1*03:01/05:01<br>DQB1*02:01/03:02<br>DPA1*01:03/01:03<br>DPB1*02:01/04:01  |
| 6180 | GADA+<br>IA-2A+<br>ZnT8A+<br>mIAA+ | 27.1 | 11   | 16.10 | male   | Caucasian  |        |         | 25.9 | head trauma            | A*01:01 , 02:01 DRB1*01:01 ,<br>03:01 DQA1*01:01 , 05:01<br>DQB1*02:01 , 05:01                                                                    |
| 6196 | GADA+<br>mIAA+                     | 26.5 | 15   | 11.50 | female | African Am | 158.88 |         | 26.6 | anoxia                 | A*03:01 , 30:02 DRB1*12:01 ,<br>13:03 DQA1*01:01 , 05:01<br>DQB1*02:01 , 05:01                                                                    |
| 6205 | mIAA+                              | 40.9 | 33   | 7.90  | female | Caucasian  | 46.34  |         | 22.6 | anoxia                 | A*01:01 , 11:01 DRB1*04:01 ,<br>16:01 DQA1*01:02 , 03:01<br>DQB1*03:01 , 05:02                                                                    |
| 6207 | IA-2A+<br>ZnT8A+<br>mIAA+          | 16.7 | 10   | 6.70  | female | African Am |        |         | 24.4 | cerebrovascular/stroke | A*23:01 , 24:02 DRB1*09:01 ,<br>13:02 DQA1*01:02 , 03:01<br>DQB1*02:02 , 06:04                                                                    |
| 6211 | GADA+<br>IA-2A+<br>ZnT8A+<br>mIAA+ | 24   | 4    | 20.00 | female | African Am |        | 91/10.5 | 24.4 | anoxia                 | A*02:01 , 03:01 DRB1*04:05 ,<br>12:01 DQA1*03:01 , 05:01<br>DQB1*03:01 , 03:02                                                                    |
| 6215 | GADA+<br>mIAA+                     | 34   | 15   | 19.00 | male   | Caucasian  |        | 64/8.0  | 26.6 | anoxia                 | A*02:01 , 11:01 DRB1*01:03,<br>04:01 DQA1*01:01 , 03:01<br>DQB1*03:02 , 05:01                                                                     |
| 6223 | mIAA+                              | 61   | 52   | 9.00  | male   | Caucasian  |        |         | 23.4 | cerebrovascular/stroke | A*01:01 , 29:02 DRB1*03:01,<br>04:01 DQA1*03:01 , 05:01<br>DQB1*02:01 , 03:02                                                                     |
| 6224 | negative                           | 21   | 1.5  | 19.50 | female | Caucasian  |        |         | 22.8 | anoxia                 | A*02:01 , 11:01 DRB1*01:01,<br>04:04 DQA1*01:01 , 03:01<br>DQB1*03:02 , 05:01                                                                     |

|      |                                    |      |       |       |        |            |        |          |      |                        |                                                                            |
|------|------------------------------------|------|-------|-------|--------|------------|--------|----------|------|------------------------|----------------------------------------------------------------------------|
| 6236 | GADA+<br>mIAA+                     | 25   | 11    | 14.00 | male   | Caucasian  |        | 103/11.6 | 20.1 | anoxia                 | A*24:02, 24:02 DRB1*03:01,<br>08:01 DQA1*04:01, 05:01<br>DQB1*02:01, 04:02 |
| 6237 | GADA+<br>mIAA+                     | 18   | 12    | 6.00  | female | Caucasian  |        |          | 26   | head trauma            | A*02:01, 29:01 DRB1*04:01,<br>13:03 DQA1*03:01, 05:01<br>DQB1*03:01, 03:02 |
| 6241 | mIAA+                              | 33   | 31    | 2.00  | male   | Caucasian  |        |          | 18.4 | cerebrovascular/stroke | A*02:01, 03:01 DRB1*03:01,<br>04:01 DQA1*03:01, 05:01<br>DQB1*02:01, 03:02 |
| 6242 | IA-2A+<br>mIAA+                    | 39   | 19    | 20.00 | male   | Caucasian  |        |          | 19.5 | head trauma            | A*02:01, 02:01 DRB1*01:01,<br>04:01 DQA1*01:01, 03:01<br>DQB1*03:02, 05:01 |
| 6244 | mIAA+                              | 34   | 28    | 6.00  | male   | Caucasian  | 16.55  | 41/5.9   | 23.8 | head trauma            | A*01:01, 02:06 DRB1*03:01,<br>04:01 DQA1*03:01, 05:01<br>DQB1*02:01, 03:02 |
| 6247 | mIAA+                              | 24   | 0.6   | 23.40 | male   | Caucasian  | 155.57 |          | 24.3 | head trauma            | A*24:02, 68:01 DRB1*04:04,<br>11:01 DQA1*03:01, 05:01<br>DQB1*03:01, 03:02 |
| 6258 | mIAA+                              | 39   | 37    | 2.00  | female | Caucasian  |        | 64/8.0   | 28.7 | head trauma            | A*02:01, 02:01 DRB1*04:01,<br>04:01 DQA1*03:01, 03:01<br>DQB1*03:02, 03:02 |
| 6261 | GADA+<br>mIAA+                     | 16   | 14.16 | 1.84  | male   | Caucasian  |        | 55/7.2   | 20.7 | anoxia                 | A*03:01, 30:01 DRB1*01:01,<br>04:01 DQA1*01:01, 03:01<br>DQB1*03:02, 05:01 |
| 6262 | GADA+<br>IA-2A+<br>mIAA+           | 44   | 8     | 36.00 | male   | African Am |        |          | 21.5 | anoxia                 | A*01:02,11:01<br>DRB1*04:01,04:05<br>DQA1*03:01,03:01<br>DQB1*03:02,03:02  |
| 6264 | negative                           | 12   | 9     | 3.00  | female | Caucasian  |        | 74/8.9   | 22   | DKA                    | A*23:01, 32:01 DRB1*03:01,<br>04:04 DQA1*03:01, 05:01<br>DQB1*02:01, 03:02 |
| 6265 | GADA+<br>mIAA+                     | 11   | 8     | 3.00  | male   | Caucasian  | 19.86  |          | 12.9 | cerebrovascular/stroke | A*03:01, 32:01 DRB1*03:01,<br>04:01 DQA1*03:01, 05:01<br>DQB1*02:01, 03:02 |
| 6266 | GADA+<br>IA-2A+<br>mIAA+<br>ZnT8A+ | 30   | 23    | 7.00  | male   | Caucasian  |        | 119/13.0 | 27.1 | anoxia                 | A*01:01,03:01<br>DRB1*03:01,04:04<br>DQA1*03:01,05:01<br>DQB1*02:01,03:02  |
| 6298 | mIAA+                              | 29   | 26    | 3.00  | male   | African Am |        | 122/13.3 | 24.3 | anoxia                 | A*24:02, 74:01<br>DRB*04:05,13:03<br>DQA1*02:01,03:01<br>DQB1*02:02,02:02  |
| 6299 | mIAA+                              | 32   | 23    | 9.00  | male   | Caucasian  |        |          | 31.8 | anoxia                 | A*01:01, 11:01<br>DRB*03:01,04:01<br>DQA1*03:01,05:01<br>DQB1*02:01,03:02  |
| 6302 | negative                           | 38.5 | 32.5  | 6.00  | male   | African Am | 56.27  | 66/8.2   | 20.5 | anoxia                 | A*24:02, 66:02<br>DRB*03:01,04:01<br>DQA1*03:01,05:01<br>DQB1*02:01,03:02  |
| 6307 | GADA+<br>mIAA+                     | 45   | 10    | 35.00 | female | Caucasian  |        |          | 19.5 | anoxia                 | A*01:01, 24:02<br>DRB1*03:01,03:01<br>DQA1*05:01,05:01<br>DQB1*02:01,02:01 |

|      |                                    |      |     |       |        |            |        |          |      |                        |                                                                            |
|------|------------------------------------|------|-----|-------|--------|------------|--------|----------|------|------------------------|----------------------------------------------------------------------------|
| 6319 | GADA+<br>mIAA+                     | 52   | 25  | 27.00 | male   | Caucasian  |        | 70/8.6   | 25.5 | anoxia                 | A*24:02, 25:01<br>DRB1*03:01,04:01<br>DQA1*03:01,05:01<br>DQB1*02:01,03:02 |
| 6321 | IA-2A+<br>ZnT8A+<br>mIAA+          | 27   | 16  | 11.00 | female | Caucasian  |        | 65/8.1   | 20.3 | anoxia                 | A*02:01, 02:01<br>DRB1*04:01,11:01<br>DQA1*03:01,05:01<br>DQB1*03:02,03:02 |
| 6322 | mIAA+                              | 22   | 17  | 5.00  | male   | Caucasian  |        |          | 23.6 | anoxia                 | A*02:01, 31:01<br>DRB1*03:01,03:01<br>DQA1*05:01,05:01<br>DQB1*02:01,02:01 |
| 6324 | GADA+<br>mIAA+                     | 29   | 2   | 27.00 | male   | Hispanic   |        | 88/10.2  | 26.2 | anoxia                 | A*11:01, 24:02<br>DRB1*11:04,15:02<br>DQA1*01:03,05:01<br>DQB1*03:01,06:01 |
| 6325 | GADA+<br>IA-2A+<br>mIAA+           | 20   | 6   | 14.00 | female | African Am | 46.34  |          | 31.2 | anoxia                 | A*02:01,66:01<br>DRB1*04:01,15:03<br>DQA1*01:02,03:01<br>DQB1*03:01,06:02  |
| 6327 | mIAA+                              | 71.2 | 57  | 14.20 | male   | Hispanic   |        |          | 23.2 | cerebrovascular/stroke | A*32:01,68:01<br>DRB1*03:01,03:01<br>DQA1*05:01,05:01                      |
| 6328 | GADA+<br>mIAA+                     | 39   | 20  | 19.00 | male   | Hispanic   |        | 72/8.7   | 24   | anoxia                 | A*29:02,68:01<br>DRB1*03:01,04:05<br>DQA1*03:01,05:01<br>DQB1*02:01,03:02  |
| 6330 | IA-2A+<br>mIAA+                    | 22   | 18  | 4.00  | male   | Caucasian  |        |          | 22.6 | anoxia                 | A*01:01, 03:01<br>DRB1*03:01,04:01<br>DQA1*03:01,05:01<br>DQB1*02:01,03:02 |
| 6337 | mIAA+                              | 20.6 | 5   | 15.60 | female | Caucasian  |        | 113/12.5 | 17.9 | cerebrovascular/stroke | A*01:01, 33:01<br>DRB1*01:02,03:01<br>DQA1*01:01,05:01<br>DQB1*02:01,05:01 |
| 6341 | mIAA+                              | 26   | 15  | 11.00 | male   | Caucasian  |        | 125/13.6 | 21.8 | cerebrovascular/stroke | A*26:01,29:02<br>DRB1*03:01,03:01<br>DQA1*05:01,05:01<br>DQB1*02:01,02:01  |
| 6360 | mIAA+                              | 4.8  | 2.5 | 2.30  | female | Caucasian  |        | 88/10.2  | 26.1 | anoxia                 | A*31:01,68:01<br>DRB1*03:01,04:04<br>DQA1*03:01,05:01<br>DQB1*02:01,03:02  |
| 6362 | GADA+                              | 24.9 | 0   |       | male   | Caucasian  | 125.78 | 86/10.0  | 28.5 | head trauma            | A*03:01,11:01<br>DRB1*01:03,03:01<br>DQA1*01:01,05:01<br>DQB1*02:01,05:01  |
| 6371 | GADA+<br>IA-2A+<br>mIAA+<br>ZnT8A+ | 12.5 | 2   | 10.50 | female | Caucasian  | 36.41  | 80/9.5   | 16.6 | cerebral edema         | A*01:01,68:02<br>DRB1*03:01,13:02<br>DQA1*01:02,05:01<br>DQB1*02:01,06:04  |
| 6380 | negative                           | 11.6 | 0   |       | female | African Am | 72.82  | 124/13.5 | 14.6 | DKA, cerebral edema    | A*33:03,68:02<br>DRB1*03:01,13:02<br>DQA1*01:02,05:01<br>DQB1*02:01,06:04  |

| 6396    | negative                  | 17.1        | 2                | 15.10                | female | Caucasian | 19.86              | 123/13.4            | 22.6        | DKA, cerebral edema    | A*23:01,24:02<br>DRB1*03:01,07:01<br>DQA1*02:01,05:01<br>DQB1*02:01,02:02                                                                        |
|---------|---------------------------|-------------|------------------|----------------------|--------|-----------|--------------------|---------------------|-------------|------------------------|--------------------------------------------------------------------------------------------------------------------------------------------------|
| 6399    | GADA+<br>IA-2A+<br>ZnT8A+ | 17.4        | 0                |                      | male   | Caucasian | 466.71             | 90/10.4             | 32          | anoxia                 | A*02:01,03:01<br>DRB1*09:01,15:01<br>DQA1*01:02,03:02<br>DQB1*03:03,06:02                                                                        |
| 6405    | GADA+<br>IA-2A+<br>ZnT8A+ | 29.1        | 0.6              | 28.50                | female | Hispanic  | 609.04             | 53/7.0              | 42.5        | cerebrovascular/stroke | A*30:02,31:01 B*18:01,40:02<br>DRB1*03:01,04:07<br>DQA1*05:01,03:01<br>DQB1*02:01,03:02                                                          |
|         |                           |             |                  |                      |        |           |                    |                     |             |                        |                                                                                                                                                  |
| Aab+    |                           |             |                  |                      |        |           |                    |                     |             |                        |                                                                                                                                                  |
| nPOD ID | AutoAb                    | Age (years) | Duration (years) | Age at Onset (years) | Sex    | Ethnicity | C-Peptide (pmol/L) | HbA1c (mmol/mol)/ % | BMI (kg/m2) | Cause of Death         | HiRes HLA                                                                                                                                        |
| 6044    | GADA+                     | 41.4        |                  |                      | male   | hispanic  | 4485.05            |                     | 27.4        | no info                | A*01:01/33:01 B*14:02/37:01<br>C*06:02/08:02<br>DRB1*01:02/15:01<br>DQA1*01:01/01:02<br>DQB1*05:01/06:02<br>DPA1*01:03/01:03<br>DPB1*04:01/04:02 |
| 6090    | GADA+                     | 2.2         |                  |                      | male   | Hispanic  | 1767.54            |                     | 18.8        | head trauma            | A*02:05/24:02 B*07:02/40:05<br>C*03:04/07:02<br>DRB1*04:04/15:01<br>DQA1*01:02/03:01<br>DQB1*03:02/06:02<br>DPA1*01:03/01:03<br>DPB1*03:01/04:02 |
| 6101    | GADA+                     | 64.8        |                  |                      | male   | Caucasian | 8665.58            |                     | 34.3        | stroke                 | A*02:01/32:01 B*44:02/51:01<br>C*01:02/05:01<br>DRB1*13:02/15:01<br>DQA1*01:02/01:02<br>DQB1*06:02/06:04<br>DPA1*01:03/01:03<br>DPB1*03:01/04:01 |
| 6123    | GADA+                     | 23.2        |                  |                      | female | Caucasian | 665.31             | 36/5.4              | 17.6        | head trauma            | A*02:01/24:02 B*35:01/51:01<br>C*01:02/03:03<br>DRB1*08:01/11:01<br>DQA1*04:01/05:01<br>DQB1*03:01/04:02<br>DPA1*01:03/01:03<br>DPB1*04:01/04:01 |
| 6151    | GADA+                     | 30          |                  |                      | male   | Caucasian | 1817.19            |                     | 24.2        | anoxia                 | A*02:01 , 24:02 DRB1*01:01 ,<br>07:01 DQA1*01:01 , 02:01<br>DQB1*02:02 , 05:01                                                                   |
| 6154    | GADA+                     | 48.5        |                  |                      | female | Caucasian | BD                 |                     | 24.5        | head trauma            | A*02:01/03:01 B*07:02/07:02<br>C*07:02/07:02<br>DRB1*09:01/15:01<br>DQA1*01:02/03:01<br>DQB1*03:03/06:03<br>DPA1*01:03/01:03<br>DPB1*02:01/04:01 |

|      |                 |       |  |  |        |            |         |        |      |             |                                                                                         |
|------|-----------------|-------|--|--|--------|------------|---------|--------|------|-------------|-----------------------------------------------------------------------------------------|
| 6170 | GADA+           | 34.5  |  |  | female | African Am | 1419.99 | 52/6.9 | 36.9 | anoxia      | A*29:02 , 74:01 DRB1*04:01 ,<br>13:03 DQA1*02:01 , 03:01<br>DQB1*02:02 , 03:01          |
| 6181 | GADA+           | 31.9  |  |  | male   | Caucasian  | 198.6   |        | 21.9 | head trauma | A*03:01 , 11:01 DRB1*01:01 ,<br>04:01 DQA1*01:01 , 03:01<br>DQB1*03:02 , 05:01          |
| 6184 | GADA+           | 47.6  |  |  | female | Hispanic   | 1132.02 |        | 27   | head trauma | A*02:06 , 68:03 DRB1*04:07 ,<br>04:07 DQA1*03:01 , 03:01<br>DQB1*03:02 , 03:02          |
| 6197 | GADA+<br>IA-2A+ | 22    |  |  | male   | African Am | 5785.88 | 37/5.5 | 28.2 | head trauma | A*02:02 , 24:02 DRB1*03:02 ,<br>07:01 DQA1*02:01 , 04:01<br>DQB1*02:02 , 04:02          |
| 6267 | GADA+<br>IA-2A+ | 23    |  |  | female | Caucasian  | 5491.29 | 31/5.0 | 23.5 | anoxia      | A*01:01,11:01<br>DRB1*04:01,04:04<br>DQA1*03:01,03:01<br>DQB1*03:02,03:02               |
| 6301 | GADA+           | 26    |  |  | male   | African Am | 1297.52 | 37/5.5 | 32.1 | head trauma | A*23:01, 23:01<br>DRB*11:01,13:04<br>DQA1*01:02,05:01<br>DQB1*03:19,06:02               |
| 6303 | GADA+           | 22    |  |  | male   | Caucasian  | 1002.93 | 36/5.4 | 31.9 | head trauma | A*01:01, 11:01<br>DRB*03:01,07:01<br>DQA1*02:01,05:01<br>DQB1*02:01,02:02               |
| 6310 | GADA+           | 28    |  |  | female | Hispanic   | 3488.74 |        | 22.4 | anoxia      | A*03:01, 30:01<br>DRB1*07:01,11:02<br>DQA1*02:01,05:01<br>DQB1*02:02,03:19              |
| 6314 | GADA+           | 21    |  |  | male   | Caucasian  | 493.19  |        | 23.8 | head trauma | A*02:05, 24:02<br>DRB1*01:03,04:01<br>DQA1*01:01,03:01<br>DQB1*03:01,05:01              |
| 6347 | mIAA+           | 8.5   |  |  | male   | Caucasian  | 1079.06 |        | 19.5 | head trauma | A*02:01,32:01<br>DRB1*01:01,15:01<br>DQA1*01:01,01:02<br>DQB1*05:01,06:02               |
| 6388 | GADA+<br>mIAA+  | 25.2  |  |  | female | Hispanic   | 456.78  | 39/5.7 | 26   | anoxia      | A*02:01,02:01<br>DRB1*01:02,04:07<br>DQA1*01:01,03:01<br>DQB1*03:01,05:01               |
| 6397 | GADA+           | 21.16 |  |  | female | Caucasian  | 4226.87 | 42/6.0 | 29.6 | head trauma | A*02:01,02:01<br>DRB1*13:01,15:01<br>DQA1*01:02,01:03<br>DQB1*06:02,06:03               |
| 6400 | GADA+           | 25.15 |  |  | male   | Hispanic   | 1380.27 | 37/5.5 | 22.2 | head trauma | A*26:01,31:01<br>DRB1*04:07,13:04<br>DQA1*03:01,05:05<br>DQB1*03:02,03:19               |
| 6421 | GADA+           | 6.73  |  |  | male   | Hispanic   | 609.04  | 38/5.6 | 17.9 | head trauma | A*02:01,03:01 B*15:01,27:05<br>DRB1*01:01,01:01<br>DQA1*01:01,01:01<br>DQB1*05:01,05:01 |
| 6424 | GADA+<br>mIAA+  | 17.7  |  |  | male   | Caucasian  | 2307.07 | 40/5.8 | 51.4 | head trauma | A*30:01,68:01 B*08:01,35:03<br>DRB1*03:01,04:01<br>DQA1*05:01,03:01<br>DQB1*02:01,03:02 |

|                            |                |                        |                             |                                     |            |                  |                               |                                |                        |                       |                                                                                                                                                  |
|----------------------------|----------------|------------------------|-----------------------------|-------------------------------------|------------|------------------|-------------------------------|--------------------------------|------------------------|-----------------------|--------------------------------------------------------------------------------------------------------------------------------------------------|
| 6429                       | GADA+<br>mIAA+ | 22.1                   |                             |                                     | male       | African Am       | 744.75                        | 37/5.5                         | 19.6                   | head trauma           | A*01:01,02:01 B*44:02,81:01<br>DRB1*01:03,03:01<br>DQA1*01:01,05:01<br>DQB1*05:01,02:01                                                          |
| 6433                       | GADA+          | 24                     |                             |                                     | male       | Hispanic         | 1469.64                       | 34/5.3                         | 30.8                   | head trauma           | A*30:02,68:01 B*08:01,45:01<br>DRB1*04:05,12:01<br>DQA1*03:01,05:05<br>DQB1*03:02,03:01                                                          |
| 6437                       | GADA+          | 27.4                   |                             |                                     | male       | Caucasian        | 2062.13                       | 39/5.7                         | 24.2                   | head trauma           | A*01:01,23:01 B*08:01,18:01<br>DRB1*03:01,11:04<br>DQA1*05:01,05:01<br>DQB1*02:01,03:01                                                          |
|                            |                |                        |                             |                                     |            |                  |                               |                                |                        |                       |                                                                                                                                                  |
| <b>Type 2<br/>Diabetes</b> |                |                        |                             |                                     |            |                  |                               |                                |                        |                       |                                                                                                                                                  |
| <b>nPOD ID</b>             | <b>AutoAb</b>  | <b>Age<br/>(years)</b> | <b>Duration<br/>(years)</b> | <b>Age at<br/>Onset<br/>(years)</b> | <b>Sex</b> | <b>Ethnicity</b> | <b>C-Peptide<br/>(pmol/L)</b> | <b>HbA1c<br/>(mmol/mol)/ %</b> | <b>BMI<br/>(kg/m2)</b> | <b>Cause of Death</b> | <b>HiRes HLA</b>                                                                                                                                 |
| 6028                       | negative       | 33.2                   | 17                          | 16                                  | male       | African Am       | 7414.4                        |                                | 30.2                   | head trauma           | A*02:01/02:01 B*44:02/45:01<br>C*05:01/16:01<br>DRB1*13:01/14:01<br>DQA1*01:01/01:03<br>DQB1*05:03/06:03<br>DPA1*01:03/02:01<br>DPB1*01:01/04:01 |
| 6114                       | negative       | 42.8                   | 2                           | 40                                  | male       | Caucasian        | 191.98                        | 62/7.8                         | 31                     | anoxia                | A*03:01/31:01 B*07:02/15:01<br>C*03:03/07:02<br>DRB1*07:01/15:01<br>DQA1*01:02/02:01<br>DQB1*03:03/06:02<br>DPA1*01:03/01:03<br>DPB1*04:01/04:01 |
| 6124                       | negative       | 62.3                   | 3                           | 59                                  | male       | Caucasian        | 943.35                        |                                | 33.7                   | stroke                | A*29:02/29:02 B*27:05/45:01<br>C*02:02/06:02<br>DRB1*04:01/15:01<br>DQA1*01:02/03:01<br>DQB1*03:01/06:02<br>DPA1*01:03/01:03<br>DPB1*04:01/04:01 |
| 6132                       | negative       | 55.8                   | 0                           | 55                                  | female     | Hispanic         | 264.8                         | 76/9.1                         | 44.6                   | anoxia                | A*01:01/02:01 B*08:01/56:01<br>C*01:02/07:01<br>DRB1*03:01/04:04<br>DQA1*03:01/05:01<br>DQB1*02:01/03:02<br>DPA1*01:03/02:01<br>DPB1*01:01/04:01 |
| 6133                       | negative       | 45.8                   | 20                          | 25                                  | female     | Caucasian        | 278.04                        |                                | 40.2                   | anoxia                | no info                                                                                                                                          |
| 6139                       | negative       | 37.2                   | 1.5                         | 35                                  | female     | Hispanic         | 198.6                         |                                | 45.4                   | anoxia                | A*02:01/30:02 B*40:01/57:03<br>C*03:04/07:01<br>DRB1*04:04/15:03<br>DQA1*01:02/03:01<br>DQB1*03:02/06:02<br>DPA1*01:03/01:03<br>DPB1*02:01/06:01 |

|      |          |      |     |    |        |            |         |          |      |                    |                                                                                                                                                  |
|------|----------|------|-----|----|--------|------------|---------|----------|------|--------------------|--------------------------------------------------------------------------------------------------------------------------------------------------|
| 6142 | mIAA+    | 29.8 | 14  | 16 | female | Hispanic   | 62.89   |          | 34.4 | infectious disease | A*24:02/80:01 B*39:06/58:01<br>C*07:01/07:02<br>DRB1*01:02/14:06<br>DQA1*01:01/05:01<br>DQB1*03:01/05:01<br>DPA1*01:03/01:03<br>DPB1*02:01/04:02 |
| 6149 | GADA+    | 39.3 | 16  | 23 | female | African Am | 3823.05 |          | 29.1 | stroke             | A*30:02/66:02 B*07:02/53:01<br>C*04:01/15:05<br>DRB1*09:01/15:03<br>DQA1*01:02/03:01<br>DQB1*02:02/06:02<br>DPA1*01:03/03:01<br>DPB1*04:02/18:01 |
| 6188 | negative | 36.1 | 0   | 36 | male   | Hispanic   | 1141.95 | 55/7.2   | 30.6 | anoxia             | A*02:02 , 66:01 DRB1*12:01 ,<br>14:01 DQA1*01:02 , 05:01<br>DQB1*03:01 , 06:04                                                                   |
| 6249 | mIAA+    | 45   | 15  | 30 | female | Asian      | 1380.27 |          | 32.3 | stroke             | A*02:01 , 24:02 DRB1*04:05 ,<br>04:05 DQA1*03:01 , 03:01<br>DQB1*04:02 , 04:02                                                                   |
| 6252 | negative | 20   |     |    | male   | Caucasian  | 46.34   | 115/12.7 | 37.8 | head trauma        | A*02:06 , 24:02 DRB1*08:02 ,<br>14:02 DQA1*04:01 , 05:01<br>DQB1*03:01 , 04:02                                                                   |
| 6255 | negative | 55   | 6   | 49 | male   | Caucasian  | 920.18  |          | 29.4 | stroke             | A*02:01 , 11:01 DRB1*11:01 ,<br>12:01 DQA1*05:01 , 05:01<br>DQB1*03:01 , 03:01                                                                   |
| 6272 | negative | 57   | 10  | 47 | female | African Am | 2499.05 |          | 29.6 | anoxia             | A*23:01,33:03<br>DRB1*04:05,13:02<br>DQA1*01:02,03:01<br>DQB1*03:02,06:04                                                                        |
| 6273 | negative | 45   | 2   | 43 | female | African Am | 1049.27 |          | 39.1 | anoxia             | A*23:01,33:03<br>DRB1*04:05,13:02<br>DQA1*01:02,03:01<br>DQB1*03:02,06:04                                                                        |
| 6277 | negative | 48   | 10  | 38 | male   | African Am | 155.57  |          | 29.5 | stroke             | A*23:01,23:01<br>DRB1*11:02,13:04<br>DQA1*03:01,05:01<br>DQB1*03:19,03:19                                                                        |
| 6280 | mIAA+    | 47   | 10  | 37 | male   | African Am | 1228.01 |          | 28.1 | stroke             | A*03:01,68:01<br>DRB1*04:04,07:01<br>DQA1*02:01,03:01<br>DQB1*02:02,03:02                                                                        |
| 6283 | mIAA+    | 56   | 17  | 39 | female | Caucasian  | 585.87  | 81/9.6   | 28.1 | stroke             | A*01:01,02:01<br>DRB1*07:01,13:01<br>DQA1*01:03,02:01<br>DQB1*02:02,06:03                                                                        |
| 6297 | mIAA+    | 60   | 3   | 47 | male   | Caucasian  | 1069.13 |          | 29.5 | anoxia             | A*32:01 , 68:01<br>DRB1*01:01,13:01<br>DQA1*01:01,01:03<br>DQB1*05:01,06:03                                                                      |
| 6300 | GADA+    | 67   | >10 |    | male   | Hispanic   | 1055.89 | 48/6.5   | 23.5 | anoxia             | A*02:01 , 02:06<br>DRB1*04:05,04:07<br>DQA1*03:01,03:01<br>DQB1*03:02,03:02                                                                      |
| 6304 | negative | 52   | 25  | 27 | female | Hispanic   | 774.54  |          | 37.9 | stroke             | A*30:02,68:02<br>DRB1*03:02,11:02                                                                                                                |

|      |          |    |    |    |        |           |         |         |      |        |                                                                            |
|------|----------|----|----|----|--------|-----------|---------|---------|------|--------|----------------------------------------------------------------------------|
|      |          |    |    |    |        |           |         |         |      |        | DQA1*04:01,05:01<br>DQB1*03:19,04:02                                       |
| 6308 | negative | 13 | 1  | 12 | female | Caucasian | 1721.2  |         | 34.1 | other  | A*01:01, 24:02<br>DRB1*03:01,03:01<br>DQA1*05:01,05:01<br>DQB1*02:01,02:01 |
| 6329 | mIAA+    | 49 | 25 | 24 | female | Hispanic  | 2469.26 | 99/11.2 | 36.4 | anoxia | A*24:02, 68:03<br>DRB1*04:11,08:02<br>DQA1*03:01,04:01<br>DQB1*03:02,04:02 |

Table S1. Subject Metadata.
