# Supplementary material
Source: publisher figshare collection journal article supplement (https://diabetesjournals.figshare.com/articles/dataset/_/14612202)
Supplement: Supplementary file 9 [file 1]

| <b>Gene</b><br>OMIM #<br>Cytogenetic<br>location<br>Genomic<br>coordinates | <b>Protein/<br/><u>Mode of inheritance</u></b>                                                                                               | <b>MODY</b> | <b>Neonatal<br/>Diabetes<br/>Mellitus<br/>(NDM)</b> | <b>TNDM</b> | <b>PNDM</b> | <b>NDM<br/>autoimmunity</b> | <b>Syndromic</b>                                                                                           | <b>Reference</b>                                                                                                              |
|----------------------------------------------------------------------------|----------------------------------------------------------------------------------------------------------------------------------------------|-------------|-----------------------------------------------------|-------------|-------------|-----------------------------|------------------------------------------------------------------------------------------------------------|-------------------------------------------------------------------------------------------------------------------------------|
| <b>ABCC8</b><br>600509<br>11p15.1<br>11:17,392,884-<br>17,476,869          | -ATP-binding cassette<br>transporter sub-family C<br>member 8<br><b><u>-Spontaneous, dominant<br/>or recessive</u></b>                       | 12          | X                                                   |             | X           |                             | familial<br>hyperinsulinemic<br>hypoglycemia-<br>I (HHF1)                                                  | <i>N Engl J Med</i> 355:<br>456-466, 2006.<br><i>Diabetologia</i> . 55(1):12<br>3-7, 2012.                                    |
| <b>APPL1</b><br>604299<br>3p14.3<br>3:57,227,736-<br>57,273,470            | -Adaptor Protein,<br>Phosphotyrosine<br>Interaction, PH domain,<br>and leucine zipper<br>containing 1<br><b><u>-Dominant</u></b>             | 14          |                                                     |             |             |                             |                                                                                                            | <i>Am J Hum Genet</i> .<br>97(1):177-85, 2015.                                                                                |
| <b>BLK</b><br>191305<br>8p23.1<br>8:11,493,990-<br>11,564,598              | -B lymphocyte kinase<br><b><u>-Dominant</u></b>                                                                                              | 11          |                                                     |             |             |                             |                                                                                                            | <i>PNAS</i> 106(34):14460-<br>5, 2009.<br><i>Diabetologia</i> . 56(3):49<br>2-6, 2013.<br><i>PLOS ONE</i> 12(1):1-15,<br>2017 |
| <b>BSCL2</b><br>606158<br>11q12.3<br>11:62,690,261-<br>62,709,618          | -Seipin<br><b><u>-Recessive</u></b>                                                                                                          |             | X                                                   |             |             |                             | Congenital<br>Generalized<br>Lipodystrophy Type<br>2                                                       | <i>Nat Genet</i> . 28(4):365-<br>70, 2001.                                                                                    |
| <b>CEL</b><br>114840<br>9q34.13<br>9:133,061,977-<br>133,071,862           | -Carboxyl-ester lipase<br><b><u>-Dominant</u></b>                                                                                            | 8           |                                                     |             |             |                             |                                                                                                            | <i>Nat Genet</i> . 38(1):54-<br>62, 2006.<br><i>Hum Genet</i> . 127(1):55-<br>64, 2010.                                       |
| <b>DNAJC3</b><br>601184<br>13q32.1<br>13:95,677,138-<br>95,794,988         | -Inhibitor of Protein<br>Kinase, Interferon-<br>Inducible Double-Stranded<br>RNA-Dependent Kinase<br>(PKR) PRKRI<br><b><u>-Recessive</u></b> |             |                                                     |             |             |                             | Diabetes Mellitus<br>and Multisystemic<br>Neurodegeneration                                                | <i>Diabetes</i> 54: 1074-<br>1081, 2005.<br><br><i>Am. J. Hum. Genet</i> . 95:<br>689-697, 2014.                              |
| <b>EIF2AK3</b><br>604032<br>2p11.2<br>2:88,556,739-<br>88,627,575          | -Eukaryotic translation<br>initiation factor 2-alpha<br>kinase 3 (PERK)<br><b><u>-Recessive</u></b>                                          |             | X                                                   |             | X           |                             | Wolcott-Rallison<br>syndrome                                                                               | <i>Nat Genet</i> . 25(4):406-<br>9, 2000.                                                                                     |
| <b>FOXP3</b><br>300292<br>Xp11.23<br>X:49,250,435-<br>49,266,504           | -forkhead box P3<br><b><u>-X-linked, recessive</u></b>                                                                                       |             | X                                                   |             | X           | X                           | Immune<br>dysregulation, IPEX<br>Syndrome, X-<br>linked- IDDMX<br>locus                                    | <i>Nat Genet</i> . 27(1):18-<br>20, 2001.                                                                                     |
| <b>GATA4</b><br>600576<br>8p23.1<br>8:11,676,918-<br>11,760,001            | -Transcription factor<br>GATA-4<br><b><u>-Dominant</u></b>                                                                                   |             | X                                                   |             | X           |                             | Permanent neonatal<br>diabetes with<br>pancreatic agenesis<br>and congenital<br>heart defects              | <i>Diabet Med</i> .<br>27(10):1195-200, 2010.                                                                                 |
| <b>GATA6</b><br>601656<br>18q11.2<br>18:22,169,436-<br>22,202,527          | -GATA-binding factor 6<br><b><u>-Dominant</u></b>                                                                                            |             | X                                                   |             | X           |                             | pancreatic agenesis<br>insulin-treated<br>neonatal diabetes<br>and exocrine<br>pancreatic<br>insufficiency | <i>Nat Genet</i> . 44(1):20-2,<br>2011.<br><i>Diabetes</i> . 62(3):993-7,<br>2013.                                            |
| <b>GCK</b><br>138079<br>7p13<br>7:44,143,212-<br>44,189,438                | -Glucokinase<br><b><u>-Recessive</u></b>                                                                                                     | 2           |                                                     |             | X           |                             |                                                                                                            | <i>Nature</i> . 23:356(6371):<br>721-2, 1992.                                                                                 |
| <b>GLIS3</b><br>610192<br>9p24.2<br>9:3,824,126-<br>4,310,693*             | -GLIS Family Zinc Finger<br>3<br><b><u>-Recessive</u></b>                                                                                    |             | X                                                   |             | X           |                             | Diabetes mellitus,<br>neonatal, with<br>congenital<br>hypothyroidism;<br>NDH syndrome                      | <i>Nat Genet</i> . 38(6):682-<br>7, 2006.                                                                                     |
| <b>HNF1A</b><br>142410<br>12q24.31                                         | -Hepatocyte nuclear factor<br>1-alpha<br><b><u>-Dominant</u></b>                                                                             | 3           |                                                     |             |             |                             |                                                                                                            | <i>Nature</i> . 384(6608):455<br>-8, 1996.<br><i>Diabetes</i> . 46(4):720-5,<br>1997.                                         |

|                                                                 |                                                                                                   |    |   |   |   |   |                                                                                         |                                                                                      |
|-----------------------------------------------------------------|---------------------------------------------------------------------------------------------------|----|---|---|---|---|-----------------------------------------------------------------------------------------|--------------------------------------------------------------------------------------|
| 12:120,978,514-121,002,511                                      |                                                                                                   |    |   |   |   |   |                                                                                         |                                                                                      |
| <b>HNF1B</b><br>189907<br>17q12<br>17:37,686,430-37,745,077     | -Hepatocyte nuclear factor 1-beta<br><br><b><u>-Dominant</u></b>                                  | 5  | X |   |   |   | Renal cysts and diabetes syndrome pancreatic agenesis                                   | <b>Nat Genet.</b> 17(4):384-5, 1997.                                                 |
| <b>HNF4A</b><br>600281<br>20q13.12<br>20:44,355,800-44,432,844  | -Hepatocyte nuclear factor 4-alpha<br><b><u>-Dominant</u></b>                                     | 1  |   |   |   |   |                                                                                         | <b>Nature.</b> 384(6608):458-60, 1996.                                               |
| <b>IER3IP1</b><br>609382<br>18q21.1<br>18:47,155,018-47,176,373 | -Immediate early response 3-interacting protein 1<br><br><b><u>-Recessive</u></b>                 |    | X |   | X |   | Microcephaly, epilepsy, and diabetes syndrome; MEDS                                     | <b>Am J Hum Genet.</b> 89(2):265-76, 2011.                                           |
| <b>IL2RA</b><br>147730<br>10p15.1<br>10:6,010,693-6,062,369**   | -Interleukin-2 receptor alpha chain<br><b><u>-Susceptibility locus</u></b>                        |    | X |   |   | X | Immunodeficiency 41 lymphoproliferation and autoimmunity; IMD41                         | <b>J Allergy Clin Immunol</b> 119: 482-487, 2007                                     |
| <b>INS</b><br>176730<br>11p15.5<br>11:2,159,778-2,161,208***    | -Insulin<br><br><b><u>-Spontaneous or dominant</u></b>                                            | 10 | X | X | X |   |                                                                                         | <b>Diabetes.</b> 57(4):1034-42, 2008                                                 |
| <b>ITCH</b><br>606409<br>20q11.22<br>20:34,363,234-34,511,772   | -E3 Ubiquitin Protein Ligase<br><b><u>-Recessive</u></b>                                          |    |   |   |   | X | Autoimmune disease, multisystem, with facial dysmorphism; ADMFD                         | <b>Am J Hum Genet.</b> 86(3): 447-453, 2010.                                         |
| <b>KCNJ11</b><br>600937<br>11p15.1<br>11:17,385,245-17,389,330  | -inward-rectifying ATP-sensitive K <sup>+</sup> channel<br><b><u>-Spontaneous or dominant</u></b> | 13 | X | X | X |   | Hyperinsulinemic Hypoglycemia                                                           | <b>PLoS One.</b> ;7(6): e37423, 2012                                                 |
| <b>KLF11</b><br>603301<br>2p25.1<br>2:10,043,554-10,054,835     | -Krueppel-like factor 11<br><b><u>-Dominant</u></b>                                               | 7  |   |   |   |   |                                                                                         | <b>J. Biol. Chem.</b> 286, 28414-28424, 2011.                                        |
| <b>LRBA</b><br>606453<br>4q31.3<br>4:150,264,514-151,015,724    | -Lipopolysaccharide-responsive and beige-like anchor protein<br><b><u>-Recessive</u></b>          |    | X |   |   | X | common variable immunodeficiency-8 with autoimmunity; CVID8                             | <b>J Clin Endocrinol Metab.</b> 101(3):898-904, 2016.                                |
| <b>MX1</b><br>142994<br>7q36.3<br>7:157,004,852-157,010,652     | -motor neuron and pancreas homeobox 1<br><b><u>-Recessive</u></b>                                 |    | X |   | X |   | Neonatal Diabetes; Currarino Syndrome                                                   | <b>Diabetes Metab.</b> 39(3):276-80, 2013.<br><b>Cell Metab.</b> 19(1):146-54, 2014. |
| <b>NEUROD1</b><br>601724<br>2q31.3<br>2:181,676,105-181,680,664 | -Neurogenic differentiation 1<br><b><u>-Recessive</u></b>                                         | 6  | X |   | X |   |                                                                                         | <b>Diabetes</b> 59(9):2326-31, 2010.                                                 |
| <b>NEUROG3</b><br>604882<br>10q22.1<br>10:69,571,439-69,573,453 | -Neurogenin-3<br><b><u>-Recessive</u></b>                                                         |    | X |   | X |   | childhood-onset diabetes; Permanent Neonatal Diabetes and Enteric Anendocrinosis; DIAR4 | <b>Diabetes</b> 60(4):1349-1353, 2011.                                               |
| <b>NKX2-2</b><br>604612<br>20p11.22<br>20:21,511,009-21,514,025 | -Homeobox protein Nkx-2.2<br><b><u>-Recessive</u></b>                                             |    | X |   | X |   | Neonatal Diabetes                                                                       | <b>Cell Metabolism</b> 19:146-154, 2014.                                             |
| <b>NR0B2</b><br>604630<br>1p36.11                               | -Nuclear Receptor Subfamily 0 Group B Member 2 (SHP)                                              |    | X |   |   |   | Diabetes associated with mild to moderate obesity                                       | <b>PNAS</b> 98:575-580, 2001.                                                        |

|                                                                 |                                                                                                                                  |   |   |   |   |   |                                                                                                                                    |                                                                                      |
|-----------------------------------------------------------------|----------------------------------------------------------------------------------------------------------------------------------|---|---|---|---|---|------------------------------------------------------------------------------------------------------------------------------------|--------------------------------------------------------------------------------------|
| 1:26,911,483-26,914,075                                         | <b>-Dominant (obesity not diabetes)</b>                                                                                          |   |   |   |   |   |                                                                                                                                    |                                                                                      |
| <b>PAX4</b><br>167413<br>7q32.1<br>7:127,610,291-127,618,191    | -Paired box gene 4<br><b>-Dominant</b>                                                                                           | 9 |   |   |   |   |                                                                                                                                    | <b>Acta Diabetol.</b> 53(2):205-16, 2016.                                            |
| <b>PAX6</b><br>607108<br>11p13<br>11:31,784,791-31,817,960      | -Paired box protein Pax-6<br><b>-Recessive</b>                                                                                   |   |   |   |   |   | Aniridia and Glucose Intolerance                                                                                                   | <b>Diabetes</b> 51:224-230, 2002.                                                    |
| <b>PCBD1</b><br>126090<br>10q22.1<br>10:70,882,279-70,888,785   | -pterin-4 $\alpha$ -carbinolamine dehydratase/dimerization cofactor of hepatocyte nuclear factor 1 $\alpha$<br><b>-Recessive</b> |   | X |   | X |   | Early-onset non-autoimmune diabetes with features similar to dominantly inherited HNF1A-diabetes                                   | <b>Diabetes</b> 63(10):3557-64, 2014.                                                |
| <b>PDX1</b><br>600733<br>13q12.2<br>13:27,919,981-27,926,313    | -Pancreatic duodenal homeobox 1<br><b>-Recessive</b>                                                                             | 4 | X |   | X |   | Permanent neonatal diabetes +/- pancreatic agenesis                                                                                | <b>Diabet Med.</b> 30(5):e197-200, 2013.                                             |
| <b>PLAGL1</b><br>603044<br>6q24.2<br>6:143,940,299-144,064,598  | -Pleomorphic adenoma gene-like 1<br><b>-Variable (imprinting)</b>                                                                |   | X | X |   |   | transient neonatal diabetes mellitus.                                                                                              | <b>Hum. Molec. Genet.</b> 9:453-460, 2000.<br><b>Hum. Genet.</b> 110: 139-144, 2002. |
| <b>PTF1A</b><br>607194<br>10p12.2<br>10:23,192,530-23,194,251   | -Pancreas transcription factor 1 subunit alpha<br><b>-Recessive</b>                                                              |   | X |   | X |   | cerebellar and pancreatic agenesis                                                                                                 | <b>Nat Genet.</b> 36(12):1301-5, 2004.                                               |
| <b>RFX6</b><br>612659<br>6q22.1<br>6:116,877,212-116,932,162    | -Regulatory factor X, 6<br><b>-Recessive</b>                                                                                     |   | X |   | X |   | Permanent neonatal diabetes; pancreatic hypoplasia, intestinal atresia, gallbladder aplasia or hypoplasia: Mitchell-Riley Syndrome | <b>Nature.</b> 463(7282):775-80, 2010.                                               |
| <b>SIRT1</b><br>604479<br>10q21.3<br>10:67,884,668-67,918,389   | -NAD-dependent deacetylase sirtuin-1<br><b>--Dominant</b>                                                                        |   |   |   |   | X | Late onset 7,12, 15 and 27 yo T1D diagnosis                                                                                        | <b>Cell Metabolism</b> 17:448-455, 2013.                                             |
| <b>SLC19A2</b><br>603941<br>1q24.2<br>1:169,463,908-169,485,969 | -solute carrier family 19 member 2 (Thiamine transporter 1)<br><b>-Recessive</b>                                                 |   | X |   | X |   | Thiamine responsive megaloblastic anaemia, diabetes and deafness (TRMA) syndrome                                                   | <b>Pediatric Diabetes</b> 13(4):314-21, 2012.<br><b>Nat Genet</b> 22: 300-304, 1999  |
| <b>SLC2A2</b><br>138160<br>3q26.2<br>3:170,996,340-171,026,978  | -solute carrier family 2 member 2 (GLUT2)<br><b>-Recessive</b>                                                                   |   | X | X |   |   | Fanconi-Bickel Syndrome                                                                                                            | <b>Nat Genet.</b> 17(3):324-6, 1997.                                                 |
| <b>STAT1</b><br>600555<br>2q32.2<br>2:190,969,035-191,014,249   | -Signal transducer and activator of transcription 1<br><b>-Dominant</b>                                                          |   |   |   |   | X | Immunodeficiency 31A,C; Gain-of-function mutations in STAT1 can cause an IPEX-like phenotype                                       | <b>J Allergy Clin Immunol.</b> 131(6):1611-23, 2013                                  |
| <b>STAT3</b><br>102582<br>17q21.2<br>17:42,313,323-42,388,504   | -Signal transducer and activator of transcription 3<br><b>-Dominant</b>                                                          |   | X |   | X | X | Infantile-Onset Multisystem Autoimmune Disease 1 (ADMIO1)                                                                          | <b>Blood</b> 125:591-59, 2015. <b>Nat Genet.</b> 46(8):812-4, 2014.                  |
| <b>STAT5B</b><br>604260<br>17q21.2<br>17:42,199,176-42,276,459  | -Signal transducer and activator of transcription 5                                                                              |   |   |   |   | X | Growth hormone insensitivity with immunodeficiency                                                                                 | <b>Ann N Y Acad Sci.</b> 1079:198-204, 2006<br><b>Diabetes</b> 55(10):2705-12, 2006  |

|                                                                 |                                                              |  |   |   |  |  |                                                                                                              |                                          |
|-----------------------------------------------------------------|--------------------------------------------------------------|--|---|---|--|--|--------------------------------------------------------------------------------------------------------------|------------------------------------------|
|                                                                 |                                                              |  |   |   |  |  |                                                                                                              | <i>J Biol Chem.</i> 279:11553-61, 2004   |
| <b>TRMT10A</b><br>616013<br>4q23<br>4:99,546,706-<br>99,564,056 | -tRNA methyltransferase<br>homolog gene<br><b>-Recessive</b> |  | X |   |  |  | Microcephaly, short<br>stature, and<br>impaired glucose<br>metabolism 1                                      | <i>PLOS Genetics</i> 9:1-15,<br>2013.    |
| <b>WFS1</b><br>606201<br>4p16.1<br>4:6,260,367-<br>6,303,264    | -Wolframin<br><b>-Recessive</b>                              |  |   |   |  |  | Wolfram syndrome<br>(Diabetes insipidus,<br>diabetes mellitus,<br>optic atrophy and<br>deafness,<br>DIDMOAD) | <i>Nat Genet.</i> 20(2):143-<br>8, 1998. |
| <b>ZFP57</b><br>612192<br>6p22.1<br>6:29,672,391-<br>29,681,149 | -Zinc finger protein 57<br>homolog<br><b>-Recessive</b>      |  | X | X |  |  | Transient neonatal<br>diabetes                                                                               | <i>Nat Genet.</i> 40(8):949-<br>5, 2008. |

Table S3

The annotation of this table was derived from data associated with the University of Exeter Molecular Genetics Laboratory ([http://www.diabetesgenes.org/sites/default/files/tngs\\_genes\\_v4.pdf](http://www.diabetesgenes.org/sites/default/files/tngs_genes_v4.pdf)) and the Online Mendelian Inheritance in Man<sup>®</sup> (OMIM<sup>®</sup>) site (<https://www.omim.org/>). Genomic coordinates are derived from the reference genome GRCh38.

\* The GLIS3 gene associates with the markers: rs10758593; rs7020673; and rs6476839 (Immunobase <https://www.immunobase.org/disease/T1D/>).

\*\* The IL2RA gene associates with the markers:

rs61839660; rs12251307; rs2104286; rs41295121; rs7090530; and rs10795791.

\*\*\* The INS gene associates with the markers:

rs72853903; rs689; rs7111341; and rs7928968.
