# Supplementary material
Source: publisher figshare collection journal article supplement (https://diabetesjournals.figshare.com/articles/dataset/_/14612202)
Supplement: Supplementary file 11 [file 1]

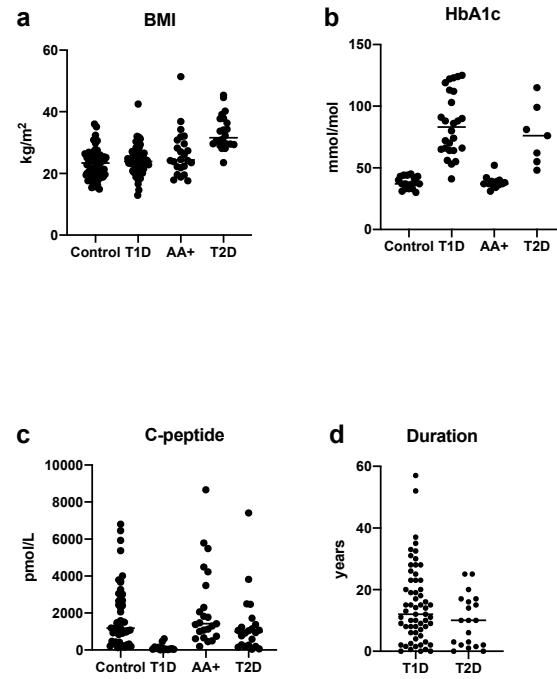

Figure S11. Donor metadata for the Unaffected/Control, T1D AAB+ and T2D. a) Body Mass Index (BMI kg/m<sup>2</sup>); b) Hemoglobin A1c (HbA1c mmol/mol); c) C-peptide pmol/L and d) Disease duration, years.
