# Supplementary material
Source: publisher figshare collection journal article supplement (https://diabetesjournals.figshare.com/articles/dataset/_/14612202)
Supplement: Supplementary file 12 [file 1]

| <b>Monogenic Diabetes Genes</b> |                               |                       |                       |
|---------------------------------|-------------------------------|-----------------------|-----------------------|
|                                 | T1D (n=25-30)                 |                       |                       |
| <b>Gene</b>                     | <b><i>Fold Difference</i></b> | <b><i>p-Value</i></b> | <b><i>q-Value</i></b> |
| ABCC8                           | 0.45                          | 0.667                 | 0.174                 |
| BLK                             | ND                            |                       |                       |
| DNAJC3                          | 1.85                          | 0.221                 | 0.078                 |
| FOXP3                           | ND                            |                       |                       |
| GCK                             | 0.51                          | 0.625                 | 0.168                 |
| IER3IP1                         | 1.53                          | 0.266                 | 0.087                 |
| IL2RA                           | ND                            |                       |                       |
| INS*                            |                               |                       |                       |
| KCNJ11                          | 1.49                          | 0.409                 | 0.122                 |
| NEUROD1                         | ND                            |                       |                       |
| NEUROG3                         | ND                            |                       |                       |
| NKX2.2                          | 0.41                          | 0.121                 | 0.051                 |
| PAX4                            | ND                            |                       |                       |
| PAX6                            | 1.30                          | 0.594                 | 0.163                 |
| PCBD1                           | 1.51                          | 0.166                 | 0.064                 |
| PDX1                            | 1.45                          | 0.099                 | 0.045                 |
| PTF1A                           | 1.55                          | 0.103                 | 0.046                 |
| RFX6                            | 0.87                          | 0.923                 | 0.226                 |
| SLC19A2                         | 2.13                          | 0.118                 | 0.051                 |
| SLC2A2                          | 2.38                          | 0.098                 | 0.045                 |
| ZFP57                           | 0.45                          |                       |                       |

Table S5. Monogenic diabetes genes which did not display altered gene expression.

ND = no amplification; \*Insulin (INS) data published previously: Cell Metab. 2017 Sep 5;26(3):568-575.e3. doi: 10.1016/j.cmet.2017.08.013. Note all values above 1 did not reach statistical significance ( $p < 0.05$ ).
