# Supplementary material
Source: publisher figshare collection journal article supplement (https://diabetesjournals.figshare.com/articles/dataset/_/14612202)
Supplement: Supplementary file 14 [file 1]

|         | <b>HUMAN SPLEEN GENE EXPRESSION</b> |                |                |            |
|---------|-------------------------------------|----------------|----------------|------------|
|         | <b>FOLD DIFFERENCE</b>              | <b>p Value</b> | <b>CONTROL</b> | <b>T1D</b> |
| EIF2AK3 | 1.27                                | 1.0            | 0/10           | 0/10       |
| STAT5B  | 1.06                                | 0.836          | 0/10           | 0/10       |
| WFS1    | 1.35                                | 0.780          | 0/10           | 0/10       |
| GATA4   | ND                                  |                |                |            |
| GLIS3   | 0.96                                | 0.618          | 0/10           | 0/10       |
| LRBA    | 1.42                                | 1.0            | 0/10           | 0/10       |
| STAT1   | 1.13                                | 1.0            | 0/10           | 0/10       |
| HNF1B   | 0.71                                | 0.714          | 1/10           | 1/10       |
| SIRT1   | 1.52                                | 0.893          | 0/10           | 0/10       |
| GATA6   | 1.99                                | 0.308          | 0/8            | 0/10       |
| ITCH    | 1.14                                | 0.893          | 0/10           | 0/10       |
| STAT3   | 0.95                                | 0.671          | 0/10           | 0/10       |
| MNX1    | ND                                  |                |                |            |
| PLAGL1  | 1.05                                | 0.836          | 0/10           | 0/10       |
| CEL     | 0.889                               | 0.826          | 0/10           | 0/9        |
| TRMT10A | 1.36                                | 0.950          | 0/10           | 0/10       |
| BSCL2   | 0.95                                | 0.950          | 0/10           | 0/10       |
| APPL1   | 1.05                                | 0.836          | 0/10           | 0/10       |
| KLF11   | 1.94                                | 0.702          | 0/9            | 0/10       |

Table S6. Normalized RTqPCR data comparing control to T1D spleen. GATA4 and MNX1 did not amplify. RefFinder (<http://150.216.56.64/referencegene.php?type=reference>) was utilized to determine spleen reference genes, CALM1 and MAFB. Normalization factors were calculated using the geometric mean of relative quantities for both control and T1D samples. Control and T1D columns indicate non-amplified samples/n.
