# Supplementary material
Source: publisher figshare collection journal article supplement (https://diabetesjournals.figshare.com/articles/dataset/_/14612202)
Supplement: Supplementary file 16 [file 1]

| <b>GENE</b>       | <b>FORWARD</b>             | <b>REVERSE</b>            | <b>ACCESSION #</b> |
|-------------------|----------------------------|---------------------------|--------------------|
| <b>ABCC8</b>      | ATGCTGCTCTTCGTCCTGGT       | CAAACCTTGATGGTCTTGGTGATG  | NM_001287174.1     |
| <b>ALS2</b>       | TCTGACTGAAGATGGTGAGGTC     | ATTCTCTCCCCACATGTACGC     | NM_020919.3        |
| <b>APPL1</b>      | TTTGTCTTCGACATCAAGCG       | GTTTTGCCAGTCCAACAGAATCA   | NM_012096.2        |
| <b>ASNS</b>       | TGAGATAGAACTGTGAAGAACAACCT | TAGCAGCCAGTAAATCGGGG      | NM_133436.3        |
| <b>ATF4</b>       | TCTAAAAGAGAGGGCGGATTCC     | CTACAGCACTCTATGTACAAGCACA | NM_182810.2        |
| <b>ATF6</b>       | GTTATTCAGTCTCGTCTCCTCGG    | CAGTCCATTTTCAGTCTTGTTCTTA | NM_007348.3        |
| <b>BLK*</b>       | ATGGTGTTGGAAGTTGCTCGT      | TGAAGACAACCAGGGGCG        | NM_001715.2        |
|                   | AACACCACTGAAGCATTGCC       |                           |                    |
| <b>BLOC1S1</b>    | CCTCAATGTGGGTGTGGCC        | CGAGCCCAGTTCTCCACATC      | NM_001487.3        |
| <b>BSCL2</b>      | TATATGCCGACAGTCAGCCAC      | CCATACATCAGCACCCGATCA     | NM_001122955.3     |
| <b>CEL</b>        | GACGCCAATCTGCCAGGTAA       | CGGATGAGGGCCCTTGTTGTAG    | NM_001807.4        |
| <b>COL6A2</b>     | AGCCTACGGAGAGTGCTACAA      | CTCCAAATTCACCCTTCTCTCCTT  | NM_001849.3        |
| <b>DDIT3/CHOP</b> | CCTGGAAATGAAGAGGAAGAATCAA  | TCTGACTGGAATCTGGAGAGTGA   | NM_001195057.1     |
| <b>DNAJB9</b>     | TCGGAGGGTGCAGGATATTAGA     | TTGATTTGGCGCTCTGATGC      | NM_012328.2        |
| <b>DNAJB11</b>    | GGCTCCCCAACTTTGACAAC       | AGCTGTTTGATACCTTCTCTCGC   | NM_016306.5        |
| <b>DNAJC3</b>     | TCAGTGAAGTTCGGGAATGTCTT    | TAGCATCTGTGTATCTGCCATCT   | NM_006260.4        |
| <b>DUT-M</b>      | TTACGTCTCTGCTTCGCTCAG      | CGCCTTAGGAAGCTCGCC        | NM_001025248.1     |
| <b>DUT-N</b>      | GTCTCCTCGCTCGCCTTC         | CGTTACTGGGTGAAATGGC       | NM_001948.3        |
| <b>EDEM1</b>      | ATATGGTGCCCTCCCTGAGA       | GGATTCTTGTTGCCTGGTAGA     | NM_014674.2        |
| <b>EIF2AK1</b>    | CGAGTCTGCCTGTCTTATGTT      | TCGGTGCACAATTCCCAGT       | NM_014413.3        |
| <b>EIF2AK2</b>    | AATTGGCCGCTAAACTTGCA       | GATGATTCAGAAGCGAGTGTGC    | NM_001135652.2     |
| <b>EIF2AK3</b>    | CACACAGGACAAGTAGGGACC      | GTTAAGGTCCTGACTCTCTCCATC  | NM_004836.6        |
| <b>EIF2AK4</b>    | CTCGGCATCAAGTTACAGGTCTT    | CCTTCGTTTGATGAAAGCCACAA   | NM_001013703.3     |
| <b>EIF2B1</b>     | GACTCACGCCTACTCCAGAG       | GGCCATTTTCTTACCTGACAAATCA | NM_001414.3        |
| <b>EIF2S1</b>     | AGAGACCTGGATATGGTGCCTA     | AGCCACTTCAATATCTGCTCGA    | NM_004094.4        |
| <b>ERN1/IRE1α</b> | TCCAGTTCTTCCAGGACGTGA      | TGATGTTCTCCCGCCAGTC       | NM_001433.4        |
| <b>FEN1</b>       | CTACCGAGGACATGGACTGC       | CCACAACTGTTCTGTTTCAG      | NM_004111.5        |
| <b>FOXO3</b>      | TAGGGTCCTGAGAACTTCTGAGTTC  | CCAGGGTCTGTAAACTGCAAA     | NM_001455.3        |
| <b>FOXP3</b>      | TTCATCTGTGGCATCATCCGAC     | GAGCGTGGCGTAGGTGAAA       | NM_001114377.1     |
| <b>GATA4</b>      | CTCTACATGAAGCTCCACGGG      | TGAAGGAGCTGCTGGTGTCTTA    | NM_001308093.1     |
| <b>GATA6</b>      | AGCAAGATGAACGGCCTCA        | TGGTAGTTGTGGTGTGACAGT     | NM_005257.5        |
| <b>GCK</b>        | AACAATGTCGTGGGGCTTCT       | TGATGGTCTTCGTAGTAGCAGGA   | NM_000162.3        |
| <b>GLIS3</b>      | TGGACACCAAACCTTATGCTTGT    | CTGGACCGCAACTTTTTCTT      | NM_001042413.1     |
| <b>HNF1A</b>      | CTCATCACCGACACCACCAA       | GCTGGAGGACACTGTGGG        | NM_000545.6        |
| <b>HNF1B</b>      | TGTCAGGAGTGCGCTACAG        | GGGAGAGGCTGTGGATATTCG     | NM_001304286.1     |
| <b>HNF4A</b>      | CTCGTTGAGTGGGCCAAGTA       | GTAGTCATTGCCTAGGAGCAGC    | NM_001287182.1     |
| <b>HSP90B1</b>    | GTGAAAAGCGGCCCGAC          | CAAGTCCCCCTTCGATCGCAG     | NM_003299.2        |
| <b>HSPA5</b>      | TTTTAATGATGCCCAACGCCA      | CAGCTGCCGTAGGCTCG         | NM_005347.4        |
| <b>IER3IP1</b>    | GAGAGAAATCGCTTGGACTTCG     | TGGCACTCTCATCACGGTTC      | NM_016097.4        |
| <b>IL2RA</b>      | GGGGACTGCTCACGTTTCT        | GGATCTCTGGCGGGTCTATC      | NM_001308243.1     |
| <b>ITCH</b>       | ATCATGTGGTTTTGGCAGTTTGTTA  | AGAATTTCTGTGGTCCATTGCTCC  | NM_001324197.1     |
| <b>KCNJ11</b>     | CAGCATCCACTCCTTCTCGTC      | GGGCACTCCTCAGTCACCAT      | NM_001166290.1     |
| <b>KLF11</b>      | CCCATCTTCGCACTCACACA       | TGACAGCTCATCCGAACGAG      | NM_001177718.1     |
| <b>LRBA</b>       | TGCTCATCAAGGTGCTGTACAAG    | TTATCCAGAAGCCACAGACG      | NM_006726.4        |
| <b>MAFB</b>       | AAGAGAGCAACGAGGAAAGGAG     | GAGCAGGCAATAAACTGATGAGA   | NM_005461.4        |
| <b>MBTPS1</b>     | TGGACGCCTTCAACTATGCC       | GCTGTTAATTCCACACCTTGTC    | NM_003791.3        |
| <b>MBTPS2</b>     | TCCCAGTTAGAGCATACAAACGA    | TTGCTTCAACTGCTTTCCGG      | NM_015884.3        |
| <b>MNX1</b>       | GGAGCACCAGTTCAAGCTCA       | AATCTTCACCTGGGTCTCGG      | NM_005515.3        |
| <b>MSMO1</b>      | GCTTTGGTTGTGCAGTCATTGA     | GGTCAACCATGCCCAAAGAA      | NM_001017369.2     |
| <b>MVK</b>        | ACACCAAAGTCCCTCGCAAT       | TCTGGGAACTTGAGCAGCC       | NM_001301182.1     |
| <b>NEUROD1*</b>   | CACTATCCTGCAGCGACACT       | CGGAAATGGTGAAACTGGCG      | NM_002500.4        |
|                   | ACTGCTCAGGACCTACTAACAAC    | ACACTCGTCTGTCCAGCTTG      |                    |
| <b>NEUROG3*</b>   | CCGGTAGAAAGGATGACGCC       | TGCCAACTCGCTCTTAGGC       | NM_020999.3        |
| <b>NELFA</b>      | AGAACCTGTCCCTCACGAGA       | GGCACGGGTTCTCTCGG         | NM_005663.4        |
| <b>NFE2L2</b>     | CTCCACAGAAGACCCCAACC       | AAGTAGCAGGTGAGGGCATG      | NM_006164.5        |

|                 |                          |                           |                |
|-----------------|--------------------------|---------------------------|----------------|
| <b>NKX2.2</b>   | TACTCCCTGCACGGTCTGG      | CCGCTTTCGCTTCTTGCC        | NM_002509.3    |
| <b>NR0B2</b>    | TTCAACCCCGATGTGCCAG      | GATAGGGCGAAAGAAGAGGTCC    | NM_021969.2    |
| <b>PAX4</b>     | CACGGCTCAGGTCACCAG       | CCAGACCCTCACC GTGC        | NM_006193.2    |
| <b>PAX6</b>     | GTTGGTATCCGGGGACTTCG     | TCTCTCAAACCTCTTCTCCAGGG   | NM_001310159.1 |
| <b>PCBD1</b>    | TTCAAAGACTTCAACAGGGCCT   | GGTGGTCCAGTTTCTCAGCC      | NM_000281.3    |
| <b>PDIA4</b>    | CCTTATGACTACAACGGCCCA    | TCAGGTTGTTAGCGGCATCC      | NM_004911.4    |
| <b>PDX1</b>     | GATGAAGTCTACCAAAGCTCACG  | ACATGACAGCCAGCTCCAC       | NM_000209.3    |
| <b>PLAGL1</b>   | CCCACGACCCCAACAAAATG     | CCAGGTGCCTCTTATAGCCC      | NM_001317157.1 |
| <b>PPIA</b>     | GTGGTATAAAAGGGGGCGGGAG   | TGCTGTCTTTGGGACCTTGT      | NM_001300981.1 |
| <b>PPP1R15A</b> | GCTCTTATCGGTTCCCATCCC    | ATGTGTCTGGGCGGGCTG        | NM_014330.3    |
| <b>PSEN1</b>    | CCAGAGGAAAGGGGAGTAAACT   | GGTTGTGTTCCAGTCTCCACT     | NM_000021.3    |
| <b>PTF1A</b>    | CGACCCTGATTATGGCCTCC     | GATCTTCAGCCGAGTCTGGG      | NM_178161.2    |
| <b>RFX6</b>     | ATTTTCAGGCAGCACAGACACT   | TGACCTTCCATTTTGTGCTGG     | NM_173560.3    |
| <b>SIRT1</b>    | ACTTCGCAACTATACCCAGAACA  | TGTTGCAAAGGAACCATGACAC    | NM_001314049.1 |
| <b>SLC2A2</b>   | AGGGGAGCACTTGGCACTT      | GGTATCTGGGGCTTTCTGGAC     | NM_000340.1    |
| <b>SLC19A2</b>  | AGCCAGACCGTCTCCTTGTA     | ACAGCAACAGCACCCAGTAA      | NM_001319667.1 |
| <b>STAT1</b>    | GTGATCTCCAACGTCAGCCA     | TGGCGTTAGGACCAAGAAGC      | NM_139266.2    |
| <b>STAT3</b>    | GGAAAGTATTGTGCGCCAGAGA   | TTCAGCACCTTCACCATTATTTCCA | NM_213662.1    |
| <b>STAT5B</b>   | TGCTTGGAAGTTTGATTCTCAGG  | CTTCACGTATCCATCAACAGCTT   | NM_012448.3    |
| <b>TMBIM6</b>   | TGGTCACTCATTTTCATTCAGGCT | ATCAGCCAAATCATCAATATCAGGG | NM_003217.2    |
| <b>TP53</b>     | ATTTTCACCCTTCAGATCCGTGG  | TTATGGCGGGAGGTAGACTGA     | NM_001126115.1 |
| <b>TRMT10A</b>  | AGCACCTTCGCCTTATTATTGA   | TGTCAAGTAAACTGCACAGGATG   | NM_152292.4    |
| <b>VCP</b>      | AGGGGAGCCTATCAAACGAGA    | TCTAGGAGGCTTCACACCAATTG   | NM_001354927.1 |
| <b>WFS1</b>     | TGCGTCTGAAGGTGGTCAAG     | GTGGGGATGATGGTGGACAG      | NM_006005.3    |
| <b>XBP1s</b>    | GTGAGTCCGCAGCAGGTG       | GGGTCCTTCTGGGTAGACCT      | NM_001079539.1 |
| <b>XBP1u**</b>  | CGCACCTGAGCCCCGA         | CTAAATCTACCACTTGCTGTTCC   | NM_005080.3    |
| <b>ZFP57</b>    | GTGAAGAAGAAGCCAGTCACCTT  | GATGGACAAACTCTCTCCACTGT   | NM_001109809.2 |

Table S4. Primer sequences

\*PRIMER SET(S) DID NOT AMPLIFY

\*\*THIS PRIMER SET DETECTS BOTH SPLICED AND UNSPLICED MESSAGES
